# Supplementary material
Source: publisher figshare collection journal article supplement (https://gsapubs.figshare.com/ndownloader/files/23295215)
Supplement: Supplementary file 1 [file 23295215]

## Sheet: Sheet1
DR Table 1. U-Pb geochronologic analyses and plots.
							Isotope ratios						Apparent ages (Ma)
Analysis	U	206Pb	U/Th	206Pb*	±	207Pb*	±	206Pb*	±	error	206Pb*	±	207Pb*	±	206Pb*	±	Best age	±	Conc
	(ppm)	204Pb		207Pb*	(%)	235U*	(%)	238U	(%)	corr.	238U*	(Ma)	235U	(Ma)	207Pb*	(Ma)	(Ma)	(Ma)	%
SJS6-106-90	218.874	7606.44	0.972206	16.6756	6.24494	0.610095	7.57161	0.0737866	4.28136	0.565449	458.929	18.9653	483.62	29.1396	602.394	135.273	458.929	18.9653	76.1842
SJS6-106-48	438.968	18086.1	0.99566	17.489	2.62829	0.585512	3.31312	0.0742676	2.01715	0.608836	461.816	8.98967	467.998	12.4238	498.417	57.9085	461.816	8.98967	92.6565
SJS6-106-37	149.782	18150.6	1.92954	18.2426	2.63982	0.564154	2.90738	0.074642	1.21827	0.419028	464.062	5.45485	454.227	10.6479	404.734	59.1131	464.062	5.45485	114.659
SJS6-106-15	41.1556	3864.62	1.94323	25.0234	28.7697	0.420021	28.9873	0.0762283	3.54548	0.122312	473.571	16.1885	356.066	87.2734	-353.35	756.216	473.571	16.1885	-134.023
SJS6-106-32	83.4819	15367.8	1.31468	16.9361	7.53919	0.622714	7.76616	0.0764893	1.86381	0.239992	475.134	8.53713	491.547	30.2699	568.792	164.321	475.134	8.53713	83.5339
SJS6-106-31	306.452	24659.2	2.22493	17.3602	2.23032	0.610616	3.92679	0.0768815	3.23192	0.823045	477.482	14.8742	483.949	15.1173	514.674	48.9918	477.482	14.8742	92.7736
SJS6-106-40	298.098	10239.7	1.17406	16.2189	7.43182	0.655642	7.55435	0.0771236	1.35504	0.179372	478.931	6.2545	511.945	30.3848	662.192	159.446	478.931	6.2545	72.3251
SJS6-106-33	728.366	18965.9	3.4306	17.3685	2.10236	0.618294	2.81302	0.0778852	1.869	0.66441	483.487	8.70582	488.777	10.9133	513.646	46.1871	483.487	8.70582	94.1285
SJS6-106-63	111.165	21454.8	2.04863	17.4267	4.52732	0.616498	4.84683	0.0779194	1.73063	0.357065	483.692	8.0646	487.65	18.7713	506.298	99.6349	483.692	8.0646	95.5351
SJS6-106-81	263.633	33152.3	2.3503	17.3232	2.37884	0.624446	2.4381	0.078455	0.534276	0.219136	486.894	2.50555	492.63	9.51664	519.363	52.2159	486.894	2.50555	93.7483
SJS6-106-88	188.477	17207.4	1.15979	17.3617	3.29575	0.623377	5.68901	0.0784951	4.63712	0.815101	487.134	21.7567	491.962	22.1854	514.479	72.425	487.134	21.7567	94.6848
SJS6-106-4	130.715	15740.3	2.30766	17.0317	5.17724	0.636998	5.52772	0.0786853	1.93697	0.350411	488.271	9.10839	500.446	21.844	556.52	112.984	488.271	9.10839	87.7365
SJS6-106-26	294.193	33129	2.01264	17.4459	3.34828	0.62266	4.44487	0.0787848	2.92333	0.657686	488.865	13.7627	491.513	17.3202	503.854	73.7024	488.865	13.7627	97.0252
SJS6-106-38	288.711	39942.7	0.935695	17.4648	2.43934	0.622817	2.68529	0.0788902	1.12268	0.418084	489.495	5.29198	491.612	10.4647	501.488	53.7313	489.495	5.29198	97.6084
SJS6-106-7	206.841	35503.2	2.45682	17.4837	2.3479	0.622925	3.9615	0.0789893	3.19075	0.805439	490.087	15.0578	491.679	15.4405	499.081	51.7315	490.087	15.0578	98.1979
SJS6-106-20	235.109	5599.49	1.55205	17.1655	3.42145	0.634773	3.78959	0.0790268	1.62931	0.429945	490.311	7.69245	499.065	14.9422	539.393	74.8419	490.311	7.69245	90.9006
SJS6-106-46	80.5995	13906.3	1.23731	19.2684	10.7588	0.568859	10.8504	0.0794966	1.40663	0.129639	493.117	6.67766	457.277	39.9687	280.964	246.829	493.117	6.67766	175.509
SJS6-106-12	57.2397	6947.35	1.10622	18.6126	12.1671	0.589126	12.1901	0.0795271	0.747912	0.0613541	493.299	3.55182	470.31	45.918	359.6	275.468	493.299	3.55182	137.18
SJS6-106-44	166.403	26832.7	1.34069	17.1733	3.16986	0.639206	4.02095	0.079615	2.47386	0.615244	493.824	11.7603	501.815	15.9221	538.397	69.3639	493.824	11.7603	91.7212
SJS6-106-83	273.878	29527.6	1.65299	17.602	3.25364	0.624843	3.6008	0.0797685	1.54261	0.428407	494.741	7.34641	492.878	14.061	484.255	71.865	494.741	7.34641	102.165
SJS6-106-54	115.169	12543.3	1.91566	17.9191	5.15104	0.614345	5.38103	0.0798415	1.55638	0.289234	495.176	7.41825	486.297	20.7956	444.647	114.575	495.176	7.41825	111.364
SJS6-106-92	424.467	35395.6	1.82274	17.2532	1.41801	0.63894	2.36465	0.0799518	1.89231	0.800249	495.835	9.03099	501.65	9.36067	528.281	31.0743	495.835	9.03099	93.8582
SJS6-106-34	343.748	73144.5	1.78716	17.5079	2.29916	0.629954	2.77403	0.0799911	1.55213	0.559521	496.07	7.41084	496.067	10.8866	496.033	50.6701	496.07	7.41084	100.007
SJS6-106-22	157.194	20744.5	2.2995	17.7939	4.5733	0.619893	4.89208	0.0799993	1.73705	0.355074	496.119	8.29457	489.78	19.011	460.234	101.448	496.119	8.29457	107.797
SJS6-106-71	94.3893	10115.4	1.61397	17.1431	7.79599	0.644059	8.09908	0.080078	2.19493	0.27101	496.588	10.4906	504.816	32.227	542.287	170.675	496.588	10.4906	91.573
SJS6-106-14	240.992	31802.9	1.29403	17.3605	1.3938	0.636204	2.05432	0.0801045	1.50915	0.734624	496.746	7.21508	499.953	8.11083	514.64	30.5974	496.746	7.21508	96.523
SJS6-106-30	224.709	26254.8	2.64575	16.9523	3.4627	0.653804	4.10074	0.080385	2.19678	0.535702	498.42	10.5366	510.817	16.4624	566.71	75.4123	498.42	10.5366	87.9498
SJS6-106-9	482.261	71745.6	5.91148	17.2555	2.37503	0.643436	3.34546	0.0805252	2.35613	0.704276	499.257	11.3192	504.432	13.3004	527.99	52.0549	499.257	11.3192	94.5581
SJS6-106-42	105.292	12644.9	1.00108	18.7875	9.50382	0.59207	9.54411	0.0806752	0.876055	0.0917901	500.151	4.21594	472.188	36.0544	338.462	215.691	500.151	4.21594	147.772
SJS6-106-77	294.21	6416.19	1.33214	16.5124	8.70077	0.676758	8.82338	0.0810479	1.46585	0.166133	502.375	7.08444	524.813	36.1753	623.645	187.978	502.375	7.08444	80.5546
SJS6-106-59	424.364	43709.8	1.18997	17.3907	1.8642	0.645236	2.32075	0.0813832	1.38225	0.595606	504.374	6.70597	505.543	9.24189	510.814	40.9782	504.374	6.70597	98.7391
SJS6-106-100	248.514	28189.8	1.30878	16.9854	2.47752	0.661779	3.37097	0.0815243	2.2859	0.678112	505.214	11.1077	515.702	13.6317	562.426	53.9792	505.214	11.1077	89.8277
SJS6-106-76	604.615	48609.4	2.35392	17.4676	0.848927	0.643877	1.2358	0.0815707	0.898063	0.726708	505.491	4.36621	504.704	4.91489	501.157	18.6701	505.491	4.36621	100.865
SJS6-106-54	247.252	26887.9	1.19661	17.3451	2.66676	0.649116	2.76108	0.0816578	0.7155	0.259138	506.01	3.48206	507.935	11.0356	516.588	58.5542	506.01	3.48206	97.9524
SJS6-106-47	265.66	57102.7	1.88452	17.6386	2.16198	0.639221	3.76582	0.0817739	3.08338	0.81878	506.702	15.0253	501.824	14.9119	479.619	47.802	506.702	15.0253	105.647
SJS6-106-53	328.247	40150.5	1.80874	17.5006	2.00851	0.64668	2.47253	0.0820809	1.44198	0.5832	508.531	7.05115	506.434	9.85975	496.979	44.2583	508.531	7.05115	102.324
SJS6-106-74	300.153	45114.5	4.67095	16.918	2.75143	0.669558	3.21594	0.0821552	1.6649	0.517704	508.974	8.14804	520.443	13.0963	571.111	59.8911	508.974	8.14804	89.12
SJS6-106-13	1007.06	53345.7	4.02238	17.2093	0.59373	0.65848	3.48541	0.0821875	3.43447	0.985384	509.166	16.8144	513.684	14.0522	533.817	12.9993	509.166	16.8144	95.3821
SJS6-106-28	158.51	23316.5	1.02586	17.5403	5.36865	0.647778	5.55275	0.0824068	1.41799	0.255366	510.473	6.95926	507.111	22.1684	491.997	118.463	510.473	6.95926	103.755
SJS6-106-25	256.356	37220.2	1.4625	17.4262	2.69576	0.652698	2.86665	0.0824921	0.974974	0.340109	510.981	4.7896	510.137	11.4959	506.342	59.3294	510.981	4.7896	100.916
SJS6-106-8	585.534	72655.1	8.18799	17.4	1.50679	0.654057	2.12982	0.0825399	1.50523	0.706739	511.265	7.39845	510.973	8.55163	509.642	33.1121	511.265	7.39845	100.319
SJS6-106-62	28.7466	3455.28	2.48776	17.8557	19.7988	0.638805	19.856	0.0827265	1.50597	0.0758444	512.376	7.41753	501.566	78.7466	452.523	443.495	512.376	7.41753	113.227
SJS6-106-51	217.918	40505.8	2.2585	17.3406	3.77892	0.658727	4.16128	0.0828453	1.74241	0.418721	513.084	8.59353	513.835	16.7813	517.157	82.9982	513.084	8.59353	99.2123
SJS6-106-27	62.1003	6964.77	1.17877	16.95	5.24605	0.674744	5.26978	0.0829484	0.499509	0.0947875	513.698	2.46639	523.592	21.5615	567.003	114.267	513.698	2.46639	90.5988
SJS6-106-98	302.3	31884.7	3.31074	17.2729	1.78556	0.662502	2.61173	0.082995	1.90602	0.729791	513.975	9.41612	516.143	10.5682	525.733	39.1358	513.975	9.41612	97.7635
SJS6-106-67	65.7475	3903.64	2.05805	16.3139	8.78122	0.701913	8.8561	0.0830499	1.14926	0.129771	514.301	5.68104	539.933	37.1032	649.699	188.876	514.301	5.68104	79.16
SJS6-106-82	184.383	21513.4	2.03777	17.3859	3.59625	0.658665	3.73545	0.083054	1.01023	0.270443	514.326	4.99398	513.797	15.063	511.466	79.07	514.326	4.99398	100.559
SJS6-106-16	111.601	11195.1	1.50857	18.3218	3.47326	0.627124	3.78545	0.0833337	1.50536	0.397671	515.991	7.46479	494.303	14.8153	395.026	77.9106	515.991	7.46479	130.622
SJS6-106-1	249.7	18633	2.31243	17.0707	2.63791	0.673977	2.7611	0.0834438	0.815537	0.295367	516.646	4.04901	523.128	11.2882	551.528	57.5748	516.646	4.04901	93.6753
SJS6-106-52	169.133	15198.4	0.728204	17.9701	5.37857	0.640685	5.73459	0.0835014	1.98911	0.346861	516.988	9.8819	502.73	22.7418	438.33	119.778	516.988	9.8819	117.945
SJS6-106-97	201.871	19860.4	2.22965	17.3796	4.58577	0.662971	4.73048	0.0835666	1.16112	0.245454	517.376	5.77259	516.43	19.1512	512.224	100.82	517.376	5.77259	101.006
SJS6-106-78	233.778	51443.2	1.71537	17.1645	2.69541	0.672155	2.89632	0.0836759	1.05994	0.365962	518.027	5.27597	522.022	11.822	539.518	58.979	518.027	5.27597	96.0166
SJS6-106-3	58.4697	10043.1	3.06455	17.9624	9.12521	0.644801	12.3754	0.0840016	8.35955	0.675495	519.964	41.7604	505.274	49.2997	439.289	203.453	519.964	41.7604	118.365
SJS6-106-10	157.83	20567.8	1.96642	17.6385	5.82112	0.658455	6.10253	0.0842337	1.83181	0.300172	521.344	9.17406	513.668	24.6064	479.639	128.722	521.344	9.17406	108.695
SJS6-106-6	457.362	61788.1	2.86882	17.3736	0.862594	0.668934	2.17217	0.0842891	1.99355	0.91777	521.673	9.99017	520.064	8.84054	513.022	18.9596	521.673	9.99017	101.686
SJS6-106-2	223.289	41286.3	3.224	17.611	4.3052	0.660599	4.9379	0.0843763	2.41828	0.489739	522.192	12.1302	514.98	19.9481	483.125	95.1307	522.192	12.1302	108.086
SJS6-106-57	389.495	19921.3	3.26763	17.2441	3.39939	0.675544	3.52932	0.0844875	0.948826	0.268841	522.853	4.76511	524.078	14.4494	529.44	74.5027	522.853	4.76511	98.7559
SJS6-106-99	290.852	38619.2	1.84678	17.0283	2.26492	0.690792	2.59734	0.0853133	1.27133	0.489476	527.759	6.44227	533.276	10.7754	556.939	49.3786	527.759	6.44227	94.7608
SJS6-106-11	347.139	103669	2.39415	17.0445	1.44433	0.691188	1.73821	0.0854435	0.967104	0.55638	528.533	4.90753	533.514	7.21346	554.851	31.5322	528.533	4.90753	95.2568
SJS6-106-50	25.0075	4097.88	3.35159	20.2429	20.1051	0.582395	20.1757	0.0855047	1.68602	0.0835668	528.896	8.56129	465.999	75.5372	166.832	473.886	528.896	8.56129	317.022
SJS6-106-65	257.88	3208.12	2.63372	17.1182	3.42771	0.689226	3.98906	0.0855693	2.04044	0.511509	529.28	10.3682	532.335	16.5277	545.45	74.9073	529.28	10.3682	97.0354
SJS6-106-66	266.767	21371.6	2.43357	17.819	2.8992	0.663033	2.9978	0.0856875	0.762532	0.254364	529.982	3.87962	516.468	12.1363	457.094	64.3285	529.982	3.87962	115.946
SJS6-106-95	322.628	37118.1	3.22991	17.2053	3.14088	0.692195	3.67298	0.0863755	1.90411	0.518411	534.065	9.75937	534.118	15.2566	534.324	68.7603	534.065	9.75937	99.9516
SJS6-106-29	173.679	13239.3	1.27134	16.7171	3.76505	0.713232	4.00387	0.0864748	1.36213	0.340202	534.655	6.98885	546.664	16.9264	597.058	81.5836	534.655	6.98885	89.5483
SJS6-106-18	128.212	26275.5	1.01124	16.7343	3.94469	0.721984	4.05819	0.087626	0.953068	0.23485	541.482	4.94989	551.837	17.2784	594.807	85.5011	541.482	4.94989	91.0348
SJS6-106-55	466.883	64708.8	2.21217	17.0179	1.38648	0.712596	3.7883	0.0879525	3.52546	0.930619	543.416	18.3727	546.286	16.0066	558.256	30.2231	543.416	18.3727	97.3417
SJS6-106-58	375.448	69845.3	2.65187	17.5279	1.69354	0.694008	2.31588	0.0882252	1.57963	0.682084	545.032	8.25555	535.206	9.63403	493.524	37.3541	545.032	8.25555	110.437
SJS6-106-24	116.684	15634.6	1.26393	17.5384	5.92983	0.694169	6.4452	0.0882986	2.5254	0.391827	545.467	13.2085	535.302	26.821	492.24	130.859	545.467	13.2085	110.813
SJS6-106-43	50.4018	14154	1.45312	20.2418	8.04739	0.615909	8.10348	0.09042	0.951752	0.11745	558.021	5.0876	487.28	31.3718	166.965	188.254	558.021	5.0876	334.215
SJS6-106-60	153.1	9208.59	2.01052	18.005	4.51307	0.701709	4.70024	0.0916322	1.31318	0.279386	565.183	7.10583	539.811	19.6823	434.016	100.556	565.183	7.10583	130.222
SJS6-106-68	134.994	12418.8	1.15611	17.1753	4.85609	0.749284	5.24767	0.0933362	1.98908	0.37904	575.238	10.9463	567.809	22.8274	538.181	106.318	575.238	10.9463	106.885
SJS6-106-41	115.931	22180.3	1.86024	15.5193	3.09907	1.0577	3.21523	0.119051	0.856431	0.266367	725.099	5.87346	732.69	16.7827	755.956	65.4245	725.099	5.87346	95.9181
SJS6-106-86	12.0997	6973.6	1.24272	17.6268	42.8959	0.951321	42.9165	0.121618	1.33	0.0309903	739.872	9.29658	678.79	215.632	481.103	991.103	739.872	9.29658	153.787
SJS6-106-73	112.763	20787.6	0.830732	15.597	2.47475	1.09274	4.60015	0.123611	3.87775	0.842963	751.314	27.5006	749.836	24.3942	745.407	52.2985	751.314	27.5006	100.793
SJS6-106-49	80.8759	17709	0.990562	15.4299	5.33233	1.12285	5.77691	0.125656	2.22237	0.384699	763.035	15.9924	764.337	31.0358	768.126	112.392	763.035	15.9924	99.3373
SJS6-106-75	392.321	2765.29	0.799616	12.698	14.0609	1.37015	14.0689	0.126183	0.473706	0.0336705	766.056	3.42153	876.228	82.764	1165.9	279.913	766.056	3.42153	65.7049
SJS6-106-69	36.0657	2172.28	0.68838	15.2617	9.6654	1.14174	9.6765	0.126377	0.463381	0.0478872	767.167	3.35152	773.336	52.4246	791.171	203.238	767.167	3.35152	96.9659
SJS6-106-5	33.6743	9435.1	0.899887	15.4247	12.9323	1.14493	13.3004	0.128085	3.10746	0.233636	776.929	22.7447	774.848	72.2092	768.836	273.406	776.929	22.7447	101.053
SJS6-106-23	250.888	54236.9	7.16858	15.07	1.77272	1.21492	2.64306	0.132789	1.96042	0.741723	803.754	14.8143	807.45	14.7217	817.677	37.0543	803.754	14.8143	98.2972
SJS6-106-96	99.0072	22712.4	1.46415	14.6359	3.08244	1.28673	3.48721	0.136585	1.63071	0.467625	825.325	12.6327	839.845	19.9267	878.433	63.7837	825.325	12.6327	93.9543
SJS6-106-94	392.908	49771.5	1.0556	14.9504	1.08006	1.2786	1.86682	0.138639	1.52266	0.815645	836.963	11.9515	836.229	10.6369	834.267	22.4877	836.963	11.9515	100.323
SJS6-106-93	688.759	5905.52	1.34727	13.9162	4.6829	1.4194	7.25482	0.143259	5.54103	0.763771	863.066	44.7603	897.109	43.243	981.965	95.4239	863.066	44.7603	87.8917
SJS6-106-70	121.641	35449.9	2.4225	14.5779	2.24825	1.38505	2.75016	0.14644	1.58391	0.575934	880.977	13.0424	882.591	16.2178	886.651	46.4715	880.977	13.0424	99.3602
SJS6-106-89	345.064	60141.1	2.50141	14.4837	0.912684	1.43865	1.70702	0.151124	1.44254	0.845064	907.261	12.2084	905.158	10.2256	900.01	18.8422	907.261	12.2084	100.806
SJS6-106-91	304.091	28720.9	1.8012	13.9691	3.31188	1.51574	3.66108	0.153564	1.56043	0.426221	920.913	13.391	936.757	22.401	974.211	67.5426	920.913	13.391	94.5292
SJS6-106-80	612.291	103294	3.8098	14.3116	0.682032	1.48815	1.33601	0.154466	1.1488	0.859878	925.948	9.90867	925.56	8.11368	924.654	14.0121	925.948	9.90867	100.14
SJS6-106-72	280.005	27573.4	18.8258	12.515	2.32527	1.81871	7.36441	0.16508	6.98768	0.948844	984.945	63.8269	1052.22	48.2846	1194.61	45.8747	1194.61	45.8747	82.4488
SJS6-106-56	223.655	47939.4	5.06553	13.7573	1.75982	1.68755	3.2782	0.168379	2.7658	0.843695	1003.17	25.6948	1003.84	20.9039	1005.27	35.7054	1005.27	35.7054	99.7918
SJS6-106-21	139.124	12219.6	1.15305	13.0227	1.91827	1.86023	2.069	0.175697	0.77523	0.374689	1043.43	7.46825	1067.07	13.6641	1115.74	38.2704	1115.74	38.2704	93.5191
SJS6-106-29	33.6628	3501.85	1.05263	12.5261	7.27795	2.21644	7.93468	0.201358	3.16079	0.398352	1182.61	34.1519	1186.25	55.5742	1192.86	143.788	1192.86	143.788	99.1411
SJS6-106-36	376.221	110415	2.07299	10.9215	0.592823	3.19719	1.7912	0.253249	1.69025	0.943643	1455.21	22.0182	1456.48	13.8551	1458.31	11.2718	1458.31	11.2718	99.7873
SJS6-106-19	53.4195	30327.9	1.09989	8.52384	1.85215	4.70682	2.05197	0.290979	0.883253	0.43044	1646.42	12.8335	1768.45	17.1861	1915.75	33.2311	1915.75	33.2311	85.9413
SJS6-106-45	203.859	138454	2.20445	9.20226	0.605414	4.84307	1.88804	0.323232	1.78835	0.947195	1805.49	28.1612	1792.41	15.8912	1777.21	11.0448	1777.21	11.0448	101.592
SJS6-106-84	118.588	58933.8	1.53887	7.98998	0.757193	6.27108	0.9284	0.363402	0.5372	0.57863	1998.28	9.23033	2014.42	8.13051	2031	13.4023	2031	13.4023	98.3888
SJS6-106-35	178.293	90798.5	4.92618	5.50401	0.988638	11.2755	2.04049	0.450104	1.78499	0.874785	2395.72	35.7167	2546.18	19.0332	2668.31	16.3748	2668.31	16.3748	89.7842
SJS6-106-17	125.946	89297.4	0.667147	5.63641	0.836965	11.4926	1.38931	0.469807	1.10891	0.79817	2482.71	22.8494	2563.98	12.9783	2628.87	13.9113	2628.87	13.9113	94.4405
SJS6-106-39	83.0143	67795.6	1.40581	5.50565	0.562307	12.0978	1.55169	0.483073	1.44622	0.932029	2540.63	30.3672	2612.01	14.5536	2667.81	9.31373	2667.81	9.31373	95.2329
SJS6-106-87	84.9416	29261.9	1.61233	4.4941	5.36129	15.6077	20.7615	0.508721	20.0573	0.966083	2651.17	436.641	2853.09	200.688	2998.96	86.2605	2998.96	86.2605	88.403
SJS6-106-35	90.4154	9677.75	1.75481	4.50794	1.47279	16.505	3.15207	0.539625	2.78683	0.884127	2781.88	62.9678	2906.52	30.1861	2994.01	23.688	2994.01	23.688	92.9147
SJS6-106-64	216.682	210683	2.65194	3.97882	0.29565	21.0585	3.06836	0.607686	3.05408	0.995347	3060.73	74.4212	3141.29	29.7517	3193.16	4.67815	3193.16	4.67815	95.8528
SJS6-106-85	42.1811	41554.3	2.25902	3.93778	0.730844	22.4838	1.1622	0.642126	0.903642	0.777529	3197.37	22.7788	3204.87	11.2987	3209.56	11.5446	3209.56	11.5446	99.6202
SJS6-106-79	103.208	86888.3	1.16826	3.82952	0.352639	23.4332	1.46993	0.65084	1.427	0.970797	3231.48	36.2673	3245.11	14.3155	3253.52	5.55335	3253.52	5.55335	99.3226
SJS6114-80	135.543	9867.69	1.97143	17.6563	9.60775	0.580309	9.62817	0.0743117	0.626746	0.065095	462.08	2.79471	464.66	35.9147	477.41	212.833	462.08	2.79471	96.7889
SJS6114-19	341.183	143918	2.49262	17.4409	1.27932	0.599369	2.10748	0.075816	1.67475	0.794672	471.1	7.60837	476.833	8.01949	504.505	28.1566	471.1	7.60837	93.3788
SJS6114-31	209.415	33825.2	1.58104	17.5308	5.2364	0.59761	5.85402	0.0759834	2.61719	0.447075	472.103	11.9142	475.716	22.2382	493.176	115.517	472.103	11.9142	95.7271
SJS6114-41	199.575	22756.5	1.32037	17.3712	3.65038	0.615386	4.11812	0.0775312	1.90622	0.462884	481.37	8.84173	486.951	15.9307	513.319	80.2399	481.37	8.84173	93.7761
SJS6114-21	110.564	31249.6	1.95656	17.3182	8.49535	0.617523	8.58166	0.0775629	1.21403	0.141468	481.56	5.63326	488.293	33.2782	519.994	186.757	481.56	5.63326	92.6087
SJS6114-46	482.582	49619.2	1.85722	17.4551	2.21211	0.614581	2.39426	0.0778039	0.915992	0.382579	483.001	4.26257	486.445	9.25406	502.723	48.6956	483.001	4.26257	96.077
SJS6114-89	39.2183	8228.67	1.95816	19.3621	17.2503	0.554185	17.3657	0.0778225	1.99862	0.11509	483.112	9.30267	447.734	62.9549	269.807	398.121	483.112	9.30267	179.058
SJS6114-72	75.3938	15787.3	1.56004	16.7715	10.2362	0.640557	10.4427	0.0779163	2.06619	0.19786	483.673	9.6279	502.651	41.4237	590.006	222.543	483.673	9.6279	81.9776
SJS6114-100	133.722	14107.8	2.27933	17.886	3.59063	0.602996	3.98899	0.0782214	1.73765	0.435612	485.498	8.12641	479.134	15.2373	448.766	79.8141	485.498	8.12641	108.185
SJS6114-69	58.5416	4743.3	1.41128	18.6238	12.3535	0.582664	12.6097	0.0787017	2.52903	0.200562	488.369	11.8947	466.172	47.1712	358.251	279.772	488.369	11.8947	136.32
SJS6114-43	319.744	23126.5	1.03041	17.504	3.48183	0.620521	3.93656	0.0787757	1.83667	0.466567	488.811	8.64592	490.174	15.3067	496.526	76.7399	488.811	8.64592	98.4461
SJS6114-14	220.882	9429.17	1.52728	17.3365	4.43491	0.62865	4.77915	0.0790442	1.78096	0.372652	490.415	8.41014	495.255	18.7332	517.672	97.4092	490.415	8.41014	94.7347
SJS6114-15	295.38	32005.7	1.75042	17.7212	1.92266	0.61567	2.52712	0.07913	1.64004	0.648976	490.927	7.75248	487.13	9.77834	469.328	42.5881	490.927	7.75248	104.602
SJS6114-67	78.0456	47848.7	1.3985	17.7954	13.8015	0.613184	13.8659	0.0791403	1.33491	0.0962729	490.989	6.31088	485.566	53.5658	460.043	307.328	490.989	6.31088	106.727
SJS6114-83	240.211	48805.1	1.26176	17.7806	5.38605	0.616122	5.47205	0.0794532	0.966316	0.176591	492.858	4.58506	487.414	21.1854	461.88	119.465	492.858	4.58506	106.707
SJS6114-79	152.618	20654.2	1.26689	17.4222	2.95848	0.62946	3.4947	0.0795373	1.8602	0.532291	493.36	8.83508	495.759	13.7085	506.876	65.0978	493.36	8.83508	97.3336
SJS6114-49	69.8142	6676.2	1.88209	16.9149	7.88902	0.648359	7.95026	0.0795395	0.984916	0.123885	493.373	4.67802	507.469	31.7627	571.484	171.867	493.373	4.67802	86.332
SJS6114-38	300.71	18749.7	1.75016	17.4917	1.4431	0.628483	1.76543	0.0797303	1.01695	0.576037	494.513	4.8409	495.15	6.91825	498.079	31.7906	494.513	4.8409	99.284
SJS6114-65	658.73	177579	3.5088	17.4469	0.682121	0.630734	3.54739	0.0798108	3.48119	0.981338	494.993	16.5867	496.553	13.9325	503.745	14.9903	494.993	16.5867	98.2628
SJS6114-73	81.6013	13955.1	1.344	17.6244	10.9297	0.625684	10.9737	0.0799775	0.980914	0.0893879	495.989	4.68277	493.404	42.9101	481.404	242.116	495.989	4.68277	103.03
SJS6114-2	129.375	34639.7	2.26905	17.3012	4.78993	0.639215	4.91413	0.0802087	1.09786	0.223409	497.369	5.25507	501.82	19.4599	522.15	105.134	497.369	5.25507	95.254
SJS6114-36	589.867	8805.67	3.12869	17.3035	1.89766	0.641699	2.34139	0.0805311	1.37149	0.585758	499.292	6.58927	503.357	9.29295	521.858	41.6358	499.292	6.58927	95.6758
SJS6114-53	58.934	9608.63	4.70395	17.4136	10.217	0.638414	10.3199	0.0806288	1.4532	0.140816	499.875	6.98969	501.324	40.8523	507.964	225.192	499.875	6.98969	98.4075
SJS6114-17	175.624	9744.37	2.01953	18.2329	3.93392	0.613923	4.25454	0.0811836	1.62031	0.380842	503.184	7.84305	486.031	16.4343	405.924	88.1031	503.184	7.84305	123.96
SJS6114-13	150.552	9362.09	3.48004	18.6384	6.15981	0.600597	6.27732	0.0811879	1.20895	0.19259	503.209	5.85217	477.612	23.9213	356.473	139.183	503.209	5.85217	141.163
SJS6114-5	51.2429	4613.21	2.3197	19.6895	12.1183	0.570085	12.1692	0.0814091	1.11177	0.0913591	504.528	5.39531	458.069	44.8944	231.221	280.692	504.528	5.39531	218.202
SJS6114-57	152.802	15136.9	2.87468	16.8438	3.97483	0.666968	4.289	0.0814788	1.61127	0.375675	504.944	7.82551	518.867	17.4263	580.65	86.3576	504.944	7.82551	86.9618
SJS6114-77	320.542	14090.4	1.74061	17.4175	2.01309	0.645652	2.06467	0.0815612	0.45863	0.222132	505.435	2.22953	505.799	8.22529	507.426	44.2563	505.435	2.22953	99.6076
SJS6114-11	177.984	18858.6	2.97777	17.3613	4.60193	0.64817	4.71862	0.0816148	1.04289	0.221015	505.754	5.07285	507.352	18.8444	514.538	101.136	505.754	5.07285	98.2929
SJS6114-7	32.0546	3716.81	3.85669	16.8075	10.0822	0.670806	10.1543	0.0817709	1.2081	0.118974	506.684	5.88688	521.202	41.4182	585.359	219.35	506.684	5.88688	86.5595
SJS6114-20	134.814	23436.1	1.57976	17.2227	5.24268	0.65475	5.38879	0.0817853	1.24632	0.23128	506.77	6.0741	511.398	21.6536	532.158	114.888	506.77	6.0741	95.2293
SJS6114-92	815.477	81304.5	1.65775	17.5149	0.854629	0.644078	1.35043	0.0818173	1.04559	0.774268	506.961	5.09767	504.828	5.37182	495.195	18.8463	506.961	5.09767	102.376
SJS6114-42	842.58	55005.2	3.83456	17.2441	0.758364	0.654533	1.13504	0.0818599	0.844515	0.744038	507.215	4.11932	511.265	4.55933	529.436	16.6116	507.215	4.11932	95.8028
SJS6114-90	580.2	63672.2	1.06283	17.3505	1.69599	0.654321	1.87545	0.0823381	0.800588	0.426877	510.063	3.92613	511.135	7.53208	515.909	37.2692	510.063	3.92613	98.867
SJS6114-29	59.117	7522.49	4.4027	18.7724	13.0186	0.605668	13.1122	0.082462	1.56399	0.119277	510.801	7.68055	480.824	50.2617	340.318	295.893	510.801	7.68055	150.095
SJS6114-98	811.399	56104.5	2.47843	17.4	0.963348	0.653883	1.84245	0.0825177	1.57054	0.852417	511.133	7.71755	510.866	7.39655	509.648	21.1874	511.133	7.71755	100.291
SJS6114-66	109.948	9718.78	1.13834	18.6222	6.26064	0.611043	6.74107	0.082528	2.49927	0.370753	511.194	12.2827	484.218	25.9668	358.444	141.408	511.194	12.2827	142.615
SJS6114-50	291.018	58287.1	1.01253	17.607	2.54835	0.647586	2.95204	0.0826957	1.49013	0.504779	512.193	7.337	506.992	11.7821	483.622	56.3051	512.193	7.337	105.908
SJS6114-64	266.102	40590.6	0.699732	17.7177	2.35293	0.644486	2.66765	0.0828169	1.25701	0.471205	512.914	6.19756	505.08	10.6159	469.73	52.091	512.914	6.19756	109.194
SJS6114-23	262.853	48500.7	1.56211	16.732	2.23249	0.685459	2.43407	0.0831819	0.969881	0.398461	515.087	4.80136	530.068	10.0517	595.089	48.4015	515.087	4.80136	86.5563
SJS6114-97	677.6	61805.1	2.22541	17.4273	1.05287	0.659114	2.1879	0.0833085	1.91791	0.876598	515.841	9.50787	514.072	8.82576	506.215	23.1613	515.841	9.50787	101.902
SJS6114-40	252.64	42111.2	2.12405	17.1969	2.67535	0.66851	3.04924	0.0833789	1.46299	0.47979	516.26	7.25834	519.806	12.4057	535.419	58.5748	516.26	7.25834	96.4216
SJS6114-71	169.891	26221.5	0.997242	17.0421	5.59676	0.675919	5.83502	0.0835443	1.65036	0.282837	517.244	8.20289	524.305	23.8998	555.154	122.179	517.244	8.20289	93.1713
SJS6114-32	373.292	56689.2	2.59014	17.0744	1.85691	0.674668	2.14457	0.0835477	1.07287	0.500274	517.264	5.33278	523.547	8.77289	551.041	40.5289	517.264	5.33278	93.8704
SJS6114-96	385.227	44461.4	1.01469	17.2049	1.18119	0.669673	2.43804	0.0835629	2.13279	0.874799	517.354	10.603	520.514	9.92923	534.381	25.8682	517.354	10.603	96.8138
SJS6114-51	286.429	27560.4	2.30564	17.0962	2.84328	0.675295	3.38517	0.083732	1.83717	0.54271	518.36	9.15033	523.927	13.8561	548.282	62.1005	518.36	9.15033	94.5426
SJS6114-91	152.106	41279.6	1.09849	17.5849	5.67626	0.65679	5.74203	0.0837654	0.866548	0.150913	518.559	4.31758	512.648	23.1169	486.359	125.381	518.559	4.31758	106.621
SJS6114-78	558.154	194120	2.30641	17.4173	2.04799	0.663212	2.71798	0.0837785	1.78693	0.65745	518.637	8.9047	516.577	11.0052	507.453	45.0245	518.637	8.9047	102.204
SJS6114-16	396.283	29042.5	0.964477	17.3663	1.70695	0.665373	2.16475	0.083805	1.33134	0.615007	518.795	6.6363	517.895	8.78218	513.924	37.4978	518.795	6.6363	100.948
SJS6114-99	121.268	5540.72	1.56957	17.0535	5.4023	0.678734	5.70851	0.0839481	1.8445	0.323115	519.646	9.20875	526.009	23.4395	553.731	117.978	519.646	9.20875	93.8444
SJS6114-45	168.136	17192.4	1.04515	17.4217	4.73643	0.665907	4.80657	0.0841399	0.818115	0.170208	520.786	4.09307	518.221	19.5111	506.927	104.23	520.786	4.09307	102.734
SJS6114-54	270.071	126981	1.52697	16.8867	1.42698	0.687404	1.63943	0.084189	0.807129	0.492322	521.078	4.04028	531.24	6.78146	575.132	31.0128	521.078	4.04028	90.6015
SJS6114-82	77.182	20951.4	2.44998	16.4959	6.35255	0.70439	6.54149	0.0842727	1.56083	0.238605	521.576	7.82029	541.41	27.4572	625.803	137.072	521.576	7.82029	83.3451
SJS6114-61	143.151	13452.2	1.30468	17.522	8.19145	0.663918	8.24677	0.0843717	0.953589	0.115632	522.165	4.78298	517.008	33.4236	494.272	180.833	522.165	4.78298	105.643
SJS6114-58	122.208	29794.3	3.76499	17.128	5.66584	0.682087	5.75718	0.0847315	1.02145	0.177423	524.303	5.14351	528.035	23.7088	544.203	123.938	524.303	5.14351	96.3433
SJS6114-76	80.0247	22484	2.56259	17.2714	8.43675	0.679001	8.54881	0.0850546	1.37965	0.161384	526.223	6.97159	526.17	35.1179	525.922	185.259	526.223	6.97159	100.057
SJS6114-62	54.3938	8920.07	2.95421	17.5583	13.9549	0.667997	13.9871	0.0850661	0.947478	0.0677395	526.291	4.78837	519.494	56.9365	489.714	309.192	526.291	4.78837	107.469
SJS6114-44	139.277	27708.4	1.21264	17.9435	6.40072	0.656602	6.69323	0.0854494	1.95705	0.292393	528.568	9.93161	512.534	26.9433	441.622	142.504	528.568	9.93161	119.688
SJS6114-84	353.719	62663.7	1.25585	17.1479	1.50331	0.688187	1.70208	0.0855886	0.798207	0.46896	529.395	4.05681	531.711	7.04534	541.682	32.8733	529.395	4.05681	97.7317
SJS6114-1	579.974	63516.6	3.39008	17.1674	0.841971	0.689008	1.14187	0.0857882	0.77133	0.675497	530.579	3.92862	532.204	4.72979	539.156	18.4289	530.579	3.92862	98.4093
SJS6114-88	284.67	30495.4	1.60436	17.3277	1.95171	0.682775	2.74574	0.0858059	1.93129	0.703379	530.685	9.83856	528.45	11.3125	518.791	42.8348	530.685	9.83856	102.293
SJS6114-56	129.302	15854.8	2.4939	17.4579	5.2482	0.684804	5.5551	0.0867077	1.82085	0.32778	536.037	9.36565	529.674	22.9304	502.352	115.595	536.037	9.36565	106.705
SJS6114-18	103.095	23820.6	3.60099	17.8433	6.98648	0.670655	7.04109	0.0867908	0.875197	0.124299	536.529	4.50559	521.11	28.7077	454.106	155.224	536.529	4.50559	118.151
SJS6114-10	132.696	16621.2	2.77618	17.7389	2.69378	0.688036	2.99775	0.0885188	1.31532	0.43877	546.771	6.89526	531.62	12.4073	467.127	59.6878	546.771	6.89526	117.05
SJS6114-39	34.0538	7560.9	2.58325	17.0434	11.8805	0.716441	11.9377	0.0885596	1.16692	0.0977515	547.013	6.1199	548.564	50.6361	554.989	260.005	547.013	6.1199	98.5629
SJS6114-70	357.795	9515.36	1.6588	16.9744	1.62209	0.729356	2.17302	0.0897913	1.44598	0.665425	554.303	7.6802	556.175	9.30597	563.829	35.3314	554.303	7.6802	98.3105
SJS6114-28	204.118	18587.7	2.66047	12.1878	33.6361	1.06528	33.7502	0.0941646	2.77233	0.0821425	580.12	15.3804	736.422	178.582	1246.71	678.058	580.12	15.3804	46.532
SJS6114-68	301.823	37458	2.2288	15.1227	1.16985	1.0485	2.35533	0.114999	2.04427	0.867933	701.717	13.5918	728.137	12.2415	810.334	24.4886	701.717	13.5918	86.596
SJS6114-8	220.493	30836.6	1.77312	15.4068	2.59079	1.05147	3.7666	0.117491	2.73406	0.72587	716.109	18.5306	729.608	19.6049	771.283	54.5645	716.109	18.5306	92.8465
SJS6114-75	32.4349	10212.3	1.30754	15.3944	4.41875	1.08241	4.54847	0.120852	1.07853	0.23712	735.468	7.49649	744.811	24.0106	772.976	93.0297	735.468	7.49649	95.1476
SJS6114-86	1049.5	7129.03	2.41184	12.1371	1.74838	1.38454	4.13289	0.121877	3.74485	0.90611	741.358	26.226	882.376	24.3707	1254.83	34.1873	741.358	26.226	59.0805
SJS6114-34	153.469	51986.1	2.46747	13.156	24.9826	1.28543	54.9342	0.122651	48.9248	0.890608	745.805	344.896	839.27	324.326	1095.38	507.852	745.805	344.896	68.0867
SJS6114-52	32.5743	14623.9	0.870553	15.0647	3.1197	1.13472	4.22002	0.123978	2.84184	0.673418	753.421	20.2073	769.999	22.7806	818.415	65.2094	753.421	20.2073	92.0585
SJS6114-87	46.8329	8076.9	1.02594	15.6474	8.88621	1.11153	9.07482	0.126143	1.84053	0.202817	765.824	13.2902	758.91	48.5425	738.576	188.368	765.824	13.2902	103.689
SJS6114-37	20.4908	15599.2	0.620888	14.8564	2.41662	1.17911	2.77227	0.127047	1.35847	0.490021	770.996	9.87166	790.897	15.2325	847.439	50.2612	770.996	9.87166	90.9796
SJS6114-94	44.4929	8025.76	1.03803	15.4417	2.92553	1.14461	3.18292	0.128189	1.2539	0.393946	777.524	9.18437	774.694	17.2507	766.524	61.6407	777.524	9.18437	101.435
SJS6114-33	178.469	36634	1.18904	15.1184	1.03744	1.22719	2.32285	0.134559	2.0783	0.894722	813.823	15.8897	813.056	12.9966	810.978	21.7167	813.823	15.8897	100.351
SJS6114-35	47.4419	18453.1	1.86152	14.426	5.44601	1.29257	6.07133	0.135239	2.68364	0.442019	817.681	20.609	842.439	34.7709	908.236	112.253	817.681	20.609	90.0296
SJS6114-26	64.59	9005.45	1.65346	14.8254	3.834	1.27903	4.33741	0.137526	2.02819	0.467604	830.659	15.8071	836.42	24.7216	851.766	79.7064	830.659	15.8071	97.522
SJS6114-9	80.8974	24522.9	1.48245	14.9502	2.95038	1.32062	3.53371	0.143194	1.94483	0.550364	862.699	15.7038	854.785	20.4218	834.324	61.5014	862.699	15.7038	103.401
SJS6114-95	426.549	106016	5.95595	14.1846	0.57862	1.49258	1.14279	0.153551	0.985477	0.862344	920.837	8.4563	927.366	6.94849	942.902	11.8552	920.837	8.4563	97.6599
SJS6114-48	351.733	84870.3	3.21118	9.63753	0.474754	4.07183	2.33981	0.284613	2.29113	0.979199	1614.55	32.7231	1648.68	19.0759	1692.44	8.75483	1692.44	8.75483	95.3978
SJS6114-24	135.218	175355	1.61417	9.32787	1.18588	4.43836	2.11433	0.300264	1.75045	0.827898	1692.62	26.0581	1719.53	17.5227	1752.43	21.7035	1752.43	21.7035	96.5869
SJS6114-3	266.248	93358.5	6.09989	7.82373	2.21836	5.63514	2.81053	0.319755	1.72567	0.614002	1788.53	26.9527	1921.49	24.2412	2068.14	39.105	2068.14	39.105	86.4803
SJS6114-74	63.7006	23247.6	0.799505	8.55706	0.712201	5.3486	1.14939	0.331943	0.902144	0.78489	1847.79	14.4935	1876.67	9.83269	1908.77	12.7894	1908.77	12.7894	96.8056
SJS6114-22	78.0321	34021.7	2.99592	8.63583	1.13509	5.30803	1.60534	0.332458	1.13521	0.707144	1850.28	18.259	1870.16	13.7171	1892.29	20.4219	1892.29	20.4219	97.7799
SJS6114-30	36.4596	30395.7	0.106649	7.98183	2.42272	6.09773	2.86302	0.352995	1.52556	0.53285	1948.89	25.658	1989.92	24.9799	2032.81	42.8794	2032.81	42.8794	95.8717
SJS6114-85	18.4667	12331.6	0.118657	8.45696	3.82597	5.78659	3.91871	0.354924	0.847498	0.21627	1958.07	14.3113	1944.41	33.9395	1929.87	68.5525	1929.87	68.5525	101.461
SJS6114-4	156.603	94616.2	2.94139	8.02925	0.520202	6.16875	1.73102	0.359229	1.65101	0.953776	1978.52	28.1286	2000.03	15.1258	2022.32	9.21811	2022.32	9.21811	97.8341
SJS6114-12	47.5068	18723.9	0.763264	8.12235	1.49458	6.10123	2.84219	0.359417	2.4175	0.850575	1979.41	41.2036	1990.42	24.8001	2001.87	26.5463	2001.87	26.5463	98.8782
SJS6114-27	126.591	41030.4	0.548343	8.0978	0.417974	6.13635	1.67991	0.360392	1.62708	0.968553	1984.03	27.787	1995.43	14.6683	2007.24	7.41747	2007.24	7.41747	98.8439
SJS6114-59	448.314	153272	1.74432	8.05901	0.262121	6.34126	1.18384	0.370644	1.15446	0.97518	2032.43	20.1247	2024.18	10.3835	2015.76	4.64835	2015.76	4.64835	100.827
SJS6114-47	338.154	92699.8	1.99777	6.41739	1.06964	8.79548	1.13712	0.409371	0.385903	0.339369	2212.04	7.22584	2317.02	10.3678	2410.86	18.1682	2410.86	18.1682	91.7534
SJS6114-55	59.1026	125468	0.792116	6.79255	0.681035	8.84036	1.69079	0.435514	1.54756	0.915292	2330.52	30.2666	2321.67	15.4245	2313.87	11.684	2313.87	11.684	100.72
SJS6114-25	226.038	229182	2.05037	4.09287	0.971964	17.4973	1.94634	0.519396	1.68627	0.866382	2696.62	37.1602	2962.51	18.6965	3148.37	15.431	3148.37	15.431	85.6513
SJS6114-81	16.452	13172.4	2.55346	4.52625	1.84741	16.2172	2.10655	0.532371	1.01223	0.480517	2751.43	22.6699	2889.69	20.1498	2987.5	29.7318	2987.5	29.7318	92.0983
SJS6114-6	67.562	47158.4	1.66465	4.99327	0.550811	14.9033	1.08928	0.539717	0.939757	0.86273	2782.27	21.2354	2809.09	10.3653	2828.39	8.98562	2828.39	8.98562	98.3694
SJS6114-60	282.127	135053	1.29251	3.84948	0.84044	20.8232	1.53112	0.581364	1.27984	0.835884	2954.31	30.3314	3130.4	14.8354	3245.34	13.2442	3245.34	13.2442	91.0325
TSA-138-35	63.3627	9015.69	2.10049	18.5963	12.6276	0.455686	12.7903	0.0614599	2.03336	0.158977	384.498	7.58965	381.253	40.6761	361.575	285.844	384.498	7.58965	106.34
TSA-138-82	96.4106	17019.2	2.44571	17.892	12.4251	0.495561	12.4892	0.0643065	1.26416	0.101221	401.763	4.9239	408.693	42.0441	448.013	277.047	401.763	4.9239	89.6765
TSA-138-10	85.2306	9505.89	1.12453	18.5923	16.8213	0.477603	16.8925	0.064402	1.54846	0.0916657	402.341	6.03965	396.427	55.4963	362.062	381.789	402.341	6.03965	111.125
TSA-138-81	1023.78	30181.6	2.07255	17.762	1.69476	0.506702	4.40197	0.0652745	4.06265	0.922916	407.623	16.0476	416.229	15.0326	464.22	37.5704	407.623	16.0476	87.8082
TSA-138-12	303.412	8926.54	1.68298	17.8385	2.45868	0.509642	3.61339	0.065936	2.64792	0.732808	411.624	10.5588	418.208	12.3867	454.69	54.5741	411.624	10.5588	90.5286
TSA-138-7	183.942	20816.9	1.97181	17.8911	2.74589	0.510741	3.54314	0.066273	2.23918	0.631977	413.662	8.97173	418.947	12.1633	448.128	61.021	413.662	8.97173	92.3091
TSA-138-65	323.035	34544.3	1.11653	17.9026	2.96196	0.518975	4.0991	0.0673845	2.83362	0.691278	420.379	11.5318	424.466	14.2214	446.705	65.8435	420.379	11.5318	94.1065
TSA-138-42	78.2133	6935.84	1.51364	16.5561	11.6761	0.567622	11.9306	0.0681577	2.45109	0.205446	425.047	10.0822	456.476	43.8914	617.944	252.822	425.047	10.0822	68.784
TSA-138-78	40.4417	8196.48	1.49864	16.8972	12.883	0.557048	13.0158	0.0682661	1.85418	0.142456	425.701	7.63829	449.603	47.3157	573.764	281.236	425.701	7.63829	74.1944
TSA-138-1	164.05	3116.77	2.65172	16.6434	3.71473	0.602332	4.33478	0.0727072	2.23408	0.515385	452.445	9.76144	478.713	16.547	606.573	80.3581	452.445	9.76144	74.5903
TSA-138-51	544.649	8423.77	1.61363	16.5375	5.90755	0.611952	6.26198	0.0733983	2.07684	0.331658	456.597	9.15473	484.79	24.1429	620.366	127.548	456.597	9.15473	73.6012
TSA-138-90	142.396	27743.4	1.30544	17.6252	5.10326	0.574603	5.39908	0.0734516	1.76262	0.326467	456.917	7.77492	460.987	20.008	481.298	112.808	456.917	7.77492	94.9342
TSA-138-97	260.634	48145.1	0.776011	17.9293	2.96048	0.565827	3.54478	0.0735777	1.94961	0.549994	457.674	8.61348	455.312	13.0072	443.385	65.8656	457.674	8.61348	103.223
TSA-138-54	346.022	36090.4	1.71188	17.1415	1.26755	0.597801	1.6972	0.0743198	1.12864	0.665	462.129	5.03321	475.837	6.44769	542.483	27.718	462.129	5.03321	85.1877
TSA-138-67	56.7759	10330.1	2.32488	18.6024	16.7598	0.558019	16.8511	0.0752862	1.75215	0.103978	467.925	7.90826	450.236	61.3568	360.846	380.456	467.925	7.90826	129.674
TSA-138-2	910.764	49749.1	2.38934	17.6162	1.10472	0.594087	2.52657	0.0759033	2.27225	0.899343	471.623	10.3339	473.474	9.56118	482.474	24.4025	471.623	10.3339	97.751
TSA-138-28	71.9989	11375.1	4.03021	16.4243	5.55915	0.641442	8.78864	0.0764087	6.80706	0.774529	474.651	31.1492	503.199	34.8863	635.209	119.739	474.651	31.1492	74.7236
TSA-138-46	180.246	39766.8	0.961825	17.7918	4.6234	0.595215	5.27111	0.0768054	2.53156	0.48027	477.026	11.6402	474.193	19.973	460.485	102.556	477.026	11.6402	103.592
TSA-138-33	274.954	25943	1.3898	17.0797	5.81677	0.622928	6.57914	0.0771642	3.07414	0.467255	479.174	14.1963	491.681	25.6466	550.351	127.093	479.174	14.1963	87.0669
TSA-138-4	66.7257	6110.36	1.56953	15.3636	11.2532	0.693108	14.276	0.0772314	8.78466	0.615345	479.576	40.6007	534.666	59.4084	777.186	237.327	479.576	40.6007	61.7067
TSA-138-13	1178.34	38455.1	0.822796	17.4209	0.893836	0.612737	2.6917	0.0774182	2.53895	0.943254	480.694	11.7607	485.285	10.3844	507.004	19.6745	480.694	11.7607	94.8106
TSA-138-15	192.498	29118.1	1.10424	17.6838	4.83125	0.604052	6.04893	0.0774728	3.63986	0.601737	481.02	16.8712	479.802	23.1334	473.963	106.943	481.02	16.8712	101.489
TSA-138-58	297.284	61396.8	1.90477	17.5549	1.13165	0.609275	1.3638	0.0775732	0.761123	0.558091	481.621	3.53214	483.103	5.24284	490.152	24.9421	481.621	3.53214	98.2596
TSA-138-70	331.626	56025.4	2.61977	17.8414	1.98345	0.599801	3.71745	0.0776129	3.1441	0.845768	481.859	14.5978	477.108	14.1529	454.353	44.0264	481.859	14.5978	106.054
TSA-138-86	60.5138	9957.41	2.19556	18.0294	13.2016	0.596782	13.235	0.0780363	0.939034	0.070951	484.391	4.3819	475.19	50.2664	430.989	295.344	484.391	4.3819	112.39
TSA-138-100	125.048	35165.2	0.932216	18.051	6.5335	0.600123	6.98955	0.0785671	2.48339	0.3553	487.564	11.6616	477.312	26.6235	428.323	145.825	487.564	11.6616	113.831
TSA-138-38	87.6947	15715.7	2.43386	17.2452	10.5103	0.629859	10.6588	0.0787788	1.77261	0.166305	488.83	8.34466	496.008	41.8481	529.302	230.855	488.83	8.34466	92.3536
TSA-138-17	146.384	20664.1	2.02538	17.2858	7.0008	0.629018	7.19587	0.078859	1.66415	0.231265	489.309	7.84147	495.484	28.2203	524.099	153.699	489.309	7.84147	93.3619
TSA-138-53	237.648	17540.4	1.03243	16.9932	5.77068	0.639898	7.18494	0.0788651	4.2805	0.59576	489.345	20.1712	502.243	28.4748	561.439	125.848	489.345	20.1712	87.1591
TSA-138-16	220.014	22549.7	1.6846	17.9214	2.3484	0.606969	3.0096	0.0788927	1.88221	0.625403	489.51	8.8725	481.647	11.543	444.37	52.2307	489.51	8.8725	110.158
TSA-138-96	67.5589	12202.5	0.999045	17.1402	8.60971	0.636737	8.79787	0.0791545	1.8098	0.205708	491.074	8.55737	500.284	34.7663	542.618	188.555	491.074	8.55737	90.5008
TSA-138-61	197.974	36448.2	1.89169	17.4962	3.26572	0.629668	3.7327	0.0799013	1.80779	0.484311	495.533	8.62255	495.889	14.6452	497.537	71.9832	495.533	8.62255	99.5974
TSA-138-56	418.657	61137.9	2.71984	17.0868	1.61518	0.647206	2.21449	0.0802051	1.51498	0.684123	497.347	7.2514	506.758	8.83507	549.443	35.292	497.347	7.2514	90.5183
TSA-138-88	695.865	108425	1.84331	17.622	0.727842	0.631314	2.90423	0.0806864	2.81155	0.968087	500.219	13.5321	496.914	11.4127	481.739	16.0804	500.219	13.5321	103.836
TSA-138-24	516.03	52937.6	0.826391	17.4092	1.88466	0.639137	2.15451	0.0806997	1.04402	0.484574	500.298	5.02568	501.772	8.53037	508.499	41.4503	500.298	5.02568	98.3872
TSA-138-44	232.067	40105.8	3.02075	16.9996	4.03163	0.65667	4.07126	0.0809629	0.566678	0.13919	501.867	2.73609	512.575	16.3873	560.638	87.9221	501.867	2.73609	89.5172
TSA-138-85	308.665	49977.1	1.38237	17.1947	1.90272	0.653403	2.52073	0.0814846	1.6534	0.655921	504.978	8.03067	510.571	10.1152	535.693	41.6606	504.978	8.03067	94.2663
TSA-138-87	89.8266	17781	2.02054	16.8503	7.1061	0.669547	7.37484	0.0818255	1.97272	0.267494	507.01	9.61869	520.437	30.0394	579.789	154.553	507.01	9.61869	87.4472
TSA-138-60	183.652	36494.5	3.10975	17.4216	4.76299	0.647752	4.97274	0.0818456	1.42899	0.287366	507.129	6.96913	507.094	19.8517	506.931	104.815	507.129	6.96913	100.039
TSA-138-3	427.335	7416.26	2.92681	16.5051	4.48999	0.687093	4.95362	0.0822492	2.09245	0.422408	509.534	10.2513	531.052	20.4874	624.598	96.8367	509.534	10.2513	81.5779
TSA-138-41	371.535	65000.6	1.24209	17.3022	1.71989	0.657542	3.06443	0.0825133	2.53628	0.827652	511.107	12.4626	513.109	12.3441	522.017	37.7192	511.107	12.4626	97.91
TSA-138-19	398.394	62510.6	1.61117	17.2225	1.89402	0.661181	3.50553	0.0825879	2.94983	0.841477	511.551	14.5067	515.336	14.1682	532.178	41.4979	511.551	14.5067	96.1241
TSA-138-37	184.411	27775.6	1.68884	17.5002	4.79918	0.656354	5.79863	0.0833066	3.25453	0.561259	515.829	16.1338	512.381	23.3355	497.019	105.792	515.829	16.1338	103.785
TSA-138-57	310.964	53793.8	3.09228	17.1878	2.31831	0.669839	2.58047	0.0835005	1.13327	0.439171	516.983	5.63004	520.614	10.5109	536.587	50.7401	516.983	5.63004	96.3466
TSA-138-73	117.554	23645.9	1.77652	17.5799	9.74	0.65721	9.89077	0.0837952	1.72038	0.173938	518.736	8.5746	512.906	39.8483	487.023	215.399	518.736	8.5746	106.512
TSA-138-63	378.582	72365.4	0.844653	17.1934	1.7938	0.67582	2.89005	0.0842736	2.26598	0.784063	521.581	11.3535	524.245	11.8347	535.843	39.2637	521.581	11.3535	97.3385
TSA-138-43	625.894	123281	2.6796	17.4963	1.16397	0.669549	1.66928	0.0849624	1.19653	0.716792	525.675	6.04023	520.438	6.7975	497.527	25.6322	525.675	6.04023	105.658
TSA-138-30	150.845	2915.59	1.16783	13.3503	20.2975	0.882592	20.3459	0.0854574	1.40208	0.0689123	528.616	7.11589	642.382	97.1478	1065.96	412.21	528.616	7.11589	49.5904
TSA-138-64	311.825	40469.5	0.897173	17.0633	2.61063	0.696289	3.17359	0.086169	1.80452	0.568604	532.84	9.22856	536.572	13.228	552.465	56.9712	532.84	9.22856	96.4479
TSA-138-79	169.101	31424.8	0.573408	17.5049	3.32511	0.682588	4.64188	0.0866598	3.23894	0.697764	535.752	16.6512	528.337	19.123	496.431	73.301	535.752	16.6512	107.921
TSA-138-66	197.283	42420.5	2.69039	17.1875	3.51103	0.695269	4.45707	0.0866694	2.74557	0.616003	535.809	14.1163	535.961	18.5628	536.609	76.8565	535.809	14.1163	99.8509
TSA-138-92	248.075	52705.7	1.21832	17.3617	2.4817	0.693016	3.62044	0.0872639	2.63605	0.728103	539.335	13.6387	534.611	15.0489	514.484	54.5433	539.335	13.6387	104.83
TSA-138-69	63.5487	12233	1.89673	18.4387	9.28497	0.661052	9.62161	0.0884023	2.52284	0.262205	546.081	13.2094	515.257	38.8993	380.75	209.16	546.081	13.2094	143.423
TSA-138-11	151.941	35573.9	2.30254	17.3374	5.55475	0.704422	6.15224	0.0885758	2.64478	0.429888	547.109	13.8728	541.429	25.8233	517.564	122.059	547.109	13.8728	105.708
TSA-138-6	132.473	24003.2	1.29238	17.1978	2.80568	0.710263	3.34224	0.0885911	1.81625	0.543421	547.199	9.52836	544.903	14.0946	535.306	61.4223	547.199	9.52836	102.222
TSA-138-72	66.6622	12440.1	4.17843	17.4571	8.4038	0.707546	8.59675	0.0895831	1.81116	0.21068	553.071	9.59933	543.288	36.1851	502.462	185.253	553.071	9.59933	110.072
TSA-138-14	262.551	71219.5	2.15866	16.8073	2.84243	0.777199	3.04408	0.0947392	1.08951	0.357912	583.505	6.07812	583.884	13.5179	585.38	61.7247	583.505	6.07812	99.6796
TSA-138-98	193.102	32011.2	0.644058	16.6331	3.3701	0.788789	3.67884	0.0951552	1.47524	0.401006	585.954	8.26299	590.485	16.4733	607.915	72.887	585.954	8.26299	96.3875
TSA-138-99	533.076	143203	1.37666	16.6555	1.33738	0.832157	2.3965	0.100522	1.98863	0.829803	617.468	11.7094	614.808	11.0527	605.002	28.9524	617.468	11.7094	102.061
TSA-138-59	257.218	45397.2	3.61197	16.0932	1.93041	0.874351	3.18884	0.102053	2.53815	0.795947	626.429	15.1516	637.927	15.1053	678.847	41.2334	626.429	15.1516	92.2784
TSA-138-62	218.533	45261.2	0.525347	16.2861	2.0405	0.878437	2.31613	0.103759	1.09583	0.473128	636.401	6.64068	640.138	10.9983	653.33	43.812	636.401	6.64068	97.4089
TSA-138-84	214.842	31869.3	1.24913	15.33	2.78944	1.03576	5.76433	0.115159	5.04445	0.875116	702.64	33.5813	721.802	29.7876	781.795	58.6478	702.64	33.5813	89.8753
TSA-138-21	73.6379	30269.2	1.10848	15.1514	3.67967	1.09359	9.5392	0.120172	8.80093	0.922607	731.555	60.8666	750.245	50.6366	806.376	77.0451	731.555	60.8666	90.7213
TSA-138-48	100.874	47132.8	0.503267	15.3677	3.42015	1.09479	3.74558	0.122021	1.52706	0.407696	742.188	10.7055	750.826	19.8789	776.633	71.9641	742.188	10.7055	95.5648
TSA-138-45	36.7049	11882.1	1.46395	15.5161	10.0091	1.08547	10.0719	0.122151	1.12283	0.111482	742.934	7.87915	746.3	53.2785	756.388	211.674	742.934	7.87915	98.2213
TSA-138-55	283.783	95442.8	1.40798	15.1389	2.02963	1.1483	3.08613	0.12608	2.32482	0.753312	765.465	16.7798	776.438	16.7511	808.098	42.4894	765.465	16.7798	94.7243
TSA-138-31	720.978	23372.1	1.06999	14.7476	1.87872	1.18222	4.40373	0.12645	3.98287	0.904431	767.58	28.8219	792.345	24.2288	862.694	38.9584	767.58	28.8219	88.9748
TSA-138-76	117.008	32579.7	0.675947	15.0668	2.90479	1.16997	3.14523	0.127849	1.20608	0.383465	775.58	8.81334	786.631	17.2205	818.117	60.7005	775.58	8.81334	94.8006
TSA-138-68	80.0242	8419.35	1.07365	14.4917	3.38134	1.22519	3.90234	0.128772	1.94804	0.499197	780.857	14.3262	812.145	21.8202	898.865	69.7517	780.857	14.3262	86.8715
TSA-138-50	668.886	60848.7	1.18198	14.9959	0.748532	1.18404	1.39053	0.128776	1.17187	0.842749	780.881	8.61838	793.192	7.65463	827.96	15.5956	780.881	8.61838	94.3138
TSA-138-80	130.818	14932.9	1.00594	14.5158	5.13576	1.23026	5.68155	0.12952	2.4298	0.427666	785.129	17.9612	814.457	31.8332	895.468	106.062	785.129	17.9612	87.678
TSA-138-83	177.301	43749.8	1.29332	14.9605	2.32093	1.19371	2.96429	0.129523	1.84398	0.622067	785.141	13.6309	797.68	16.3798	832.866	48.3815	785.141	13.6309	94.2698
TSA-138-52	97.4899	2899.13	1.00338	8.53917	51.687	2.10041	51.7953	0.130082	3.34811	0.0646412	788.336	24.8444	1148.94	372.1	1912.52	1004.65	1912.52	1004.65	41.2197
TSA-138-77	398.276	75200.2	0.794023	15.1054	1.01702	1.18827	1.95346	0.130181	1.66783	0.853786	788.895	12.3842	795.159	10.7712	812.779	21.2833	788.895	12.3842	97.0615
TSA-138-18	134.92	47683.5	1.69306	15.5059	3.01033	1.17834	3.25365	0.132516	1.23456	0.379439	802.201	9.31223	790.542	17.8727	757.776	63.5284	802.201	9.31223	105.863
TSA-138-22	605.064	58153	0.965252	15.0194	0.548328	1.22165	1.6661	0.133075	1.57329	0.944292	805.384	11.9114	810.528	9.30281	824.669	11.4251	805.384	11.9114	97.6616
TSA-138-8	337.772	97399.1	2.26107	15.1349	0.878866	1.27183	2.10156	0.139607	1.90896	0.908356	842.439	15.0754	833.209	11.9466	808.655	18.3898	842.439	15.0754	104.178
TSA-138-29	191.951	54184.1	1.39479	14.7335	2.03581	1.30711	2.44643	0.139675	1.35666	0.554544	842.822	10.7183	848.858	14.0746	864.687	42.2041	842.822	10.7183	97.4714
TSA-138-5	281.01	68878.5	2.20298	15.0604	1.58799	1.28287	2.68105	0.140126	2.16017	0.805716	845.372	17.1148	838.129	15.2992	819.004	33.1842	845.372	17.1148	103.22
TSA-138-32	63.8151	6623.26	2.52132	14.2768	10.5201	1.36356	11.2685	0.14119	4.03809	0.358352	851.39	32.2066	873.401	66.1022	929.634	216.536	851.39	32.2066	91.5833
TSA-138-27	83.0363	21969.8	1.42185	14.978	7.20289	1.30513	7.34069	0.141777	1.41562	0.192846	854.702	11.3316	847.984	42.2255	830.454	150.352	854.702	11.3316	102.92
TSA-138-39	385.077	123186	1.11264	14.886	1.02384	1.32143	2.18737	0.142666	1.93297	0.883694	859.723	15.5577	855.141	12.6434	843.279	21.306	859.723	15.5577	101.95
TSA-138-93	866.675	85198.8	9.42989	14.7622	0.646665	1.36198	1.99325	0.145821	1.88543	0.94591	877.497	15.468	872.721	11.6709	860.601	13.4357	877.497	15.468	101.963
TSA-138-25	294.531	73165.6	0.718339	14.6342	0.971886	1.39202	3.81143	0.147745	3.68544	0.966943	888.312	30.5829	885.556	22.5253	878.697	20.1123	888.312	30.5829	101.094
TSA-138-49	358.37	114268	5.128	14.2095	1.14585	1.45805	2.44667	0.150262	2.16176	0.883554	902.429	18.2045	913.202	14.7373	939.315	23.488	939.315	23.488	96.0731
TSA-138-75	97.1844	28376.3	2.45447	14.9208	2.59776	1.4081	2.75755	0.152378	0.925054	0.335462	914.28	7.88521	892.356	16.3738	838.397	54.1128	914.28	7.88521	109.051
TSA-138-95	119.597	37233.9	0.695983	14.6509	2.83531	1.44235	3.44436	0.153262	1.95567	0.567789	919.221	16.7541	906.697	20.6567	876.325	58.6915	919.221	16.7541	104.895
TSA-138-9	179.512	52249.9	1.61926	14.8855	1.88259	1.42546	2.94134	0.153892	2.25994	0.768338	922.742	19.4298	899.649	17.5541	843.351	39.1975	922.742	19.4298	109.414
TSA-138-74	186.888	60488.8	2.38448	14.5519	1.57267	1.52253	1.97923	0.160689	1.20169	0.607151	960.603	10.7246	939.496	12.1304	890.31	32.5052	890.31	32.5052	107.895
TSA-138-20	442.998	154899	2.55877	6.90454	1.42705	4.76127	6.29479	0.238427	6.13089	0.973964	1378.52	76.0935	1778.1	52.8698	2285.77	24.5568	2285.77	24.5568	60.3085
TSA-138-26	405.253	154546	0.831515	8.61746	0.242404	5.62888	1.36823	0.351804	1.34659	0.984181	1943.2	22.5913	1920.53	11.7975	1896.13	4.35953	1896.13	4.35953	102.483
TSA-138-71	275.91	175799	2.0145	7.18655	1.35121	6.80384	1.8346	0.354628	1.24096	0.676423	1956.66	20.9427	2086.22	16.2425	2216.63	23.4275	2216.63	23.4275	88.272
TSA-138-40	332.716	151337	3.39655	7.87891	0.691018	6.59227	3.03599	0.376704	2.9563	0.973753	2060.87	52.1477	2058.31	26.7728	2055.74	12.1983	2055.74	12.1983	100.249
TSA-138-89	143.965	109980	1.67013	5.68129	0.306907	12.578	1.80452	0.518273	1.77823	0.985431	2691.85	39.1309	2648.58	16.9749	2615.67	5.10876	2615.67	5.10876	102.912
TSA-138-91	267.744	308784	2.05545	4.74023	0.333863	16.9157	1.0676	0.58155	1.01406	0.949845	2955.07	24.0373	2930.07	10.2355	2912.93	5.40801	2912.93	5.40801	101.447
TSA-138-36	61.1383	74620.6	3.18562	4.33789	1.09523	19.2754	1.41722	0.60643	0.899423	0.634641	3055.69	21.8878	3055.7	13.6813	3055.69	17.5226	3055.69	17.5226	99.9999
CH-4D1-30	155.229	16889.5	1.76929	17.8432	4.17919	0.481991	5.37776	0.062375	3.38447	0.629346	390.053	12.8098	399.438	17.7611	454.125	92.8179	390.053	12.8098	85.8911
CH-4D1-12	146.471	13676.5	1.65069	18.9271	8.55146	0.457094	8.58323	0.0627464	0.737763	0.085954	392.306	2.80798	382.235	27.3466	321.705	194.585	392.306	2.80798	121.946
CH-4D1-83	218.277	32112.4	1.597	18.2384	4.9637	0.476109	5.34221	0.0629785	1.97505	0.369706	393.714	7.54334	395.4	17.4977	405.25	111.164	393.714	7.54334	97.1535
CH-4D1-84	409.923	69078.8	2.62694	18.4655	3.72651	0.473807	5.43943	0.0634542	3.96239	0.728456	396.598	15.2411	393.815	17.7578	377.483	83.8441	396.598	15.2411	105.064
CH-4D1-22	84.9577	8741.4	1.47914	18.6933	16.6863	0.475732	16.9419	0.0644981	2.93194	0.173058	402.923	11.4518	395.141	55.5111	349.857	379.501	402.923	11.4518	115.168
CH-4D1-69	70.3957	19830.4	1.44405	18.5411	12.2634	0.48036	12.3845	0.0645952	1.72758	0.139495	403.511	6.75727	398.32	40.8266	368.286	277.25	403.511	6.75727	109.565
CH-4D1-64	161.906	19397.9	1.02591	18.2991	5.60026	0.493654	5.65692	0.0655167	0.798639	0.141179	409.089	3.16563	407.398	18.986	397.804	125.615	409.089	3.16563	102.837
CH-4D1-10	65.2377	5840	1.76359	15.235	18.1467	0.593913	18.2575	0.065624	2.00848	0.110008	409.738	7.97341	473.363	69.1833	794.85	383.492	409.738	7.97341	51.5491
CH-4D1-89	252.513	16327.4	1.72916	17.6345	5.32142	0.513489	5.35932	0.065674	0.636287	0.118725	410.04	2.52779	420.793	18.4646	480.136	117.66	410.04	2.52779	85.4008
CH-4D1-45	377.134	47607.4	1.42942	17.6932	4.15347	0.512087	4.56084	0.0657124	1.88413	0.41311	410.273	7.48922	419.851	15.6847	472.823	91.9485	410.273	7.48922	86.7708
CH-4D1-24	330.06	11275	1.9277	17.2613	4.68675	0.525176	4.7801	0.0657471	0.940051	0.196659	410.482	3.73846	428.603	16.7144	527.253	102.799	410.482	3.73846	77.853
CH-4D1-44	274.285	25457.2	1.54961	18.0528	3.12747	0.503078	3.16501	0.0658685	0.486013	0.153558	411.216	1.93615	413.784	10.7566	428.106	69.7462	411.216	1.93615	96.0547
CH-4D1-11	350.402	40428	1.9264	18.5778	1.87831	0.492113	2.8406	0.0663066	2.13096	0.750177	413.866	8.54216	406.35	9.51298	363.831	42.3353	413.866	8.54216	113.752
CH-4D1-46	406.903	59679.4	1.36813	18.3767	1.6001	0.497812	2.74446	0.0663484	2.22974	0.812451	414.118	8.94344	410.22	9.26205	388.317	35.9276	414.118	8.94344	106.644
CH-4D1-93	165.603	40661.9	1.96353	18.2054	6.18042	0.502613	6.55838	0.0663639	2.19427	0.334575	414.212	8.80309	413.47	22.2784	409.305	138.378	414.212	8.80309	101.199
CH-4D1-9	92.1266	17221.4	2.98442	16.8399	10.5663	0.545059	10.6115	0.0665705	0.978231	0.0921857	415.461	3.93597	441.755	38.0285	581.174	230.095	415.461	3.93597	71.4865
CH-4D1-35	172.594	15379.7	1.17518	17.3558	4.66379	0.53176	5.11861	0.0669359	2.10933	0.41209	417.669	8.53069	432.977	18.0448	515.229	102.484	417.669	8.53069	81.0647
CH-4D1-91	486.675	59737.8	2.05068	17.9653	1.20211	0.51452	2.61496	0.0670403	2.32228	0.888072	418.3	9.40563	421.484	9.02058	438.92	26.7624	418.3	9.40563	95.3021
CH-4D1-5	280.814	42741.9	1.86623	18.322	2.49454	0.50464	2.75098	0.0670583	1.15982	0.421601	418.409	4.69865	414.839	9.36871	395.007	55.9276	418.409	4.69865	105.924
CH-4D1-41	132.236	21488.2	2.12403	18.751	6.68035	0.495331	7.81873	0.0673626	4.06268	0.519609	420.247	16.5287	408.537	26.304	342.858	151.323	420.247	16.5287	122.572
CH-4D1-54	337.495	56553.3	1.33826	18.1805	4.35108	0.51099	4.49705	0.0673779	1.13648	0.252717	420.339	4.62466	419.115	15.4434	412.361	97.3283	420.339	4.62466	101.935
CH-4D1-52	193.788	45828.2	2.19287	18.7036	5.11057	0.49803	5.26514	0.0675585	1.26643	0.24053	421.43	5.16638	410.368	17.7754	348.625	115.607	421.43	5.16638	120.884
CH-4D1-52	337.571	38790.6	1.33364	16.6203	8.00332	0.560503	17.8534	0.0675639	15.959	0.893893	421.462	65.1119	451.854	65.202	609.584	173.252	421.462	65.1119	69.1393
CH-4D1-68	64.6727	13606.2	0.780065	18.1137	10.3074	0.519386	10.4263	0.0682333	1.57	0.15058	425.503	6.4647	424.741	36.2049	420.59	230.639	425.503	6.4647	101.168
CH-4D1-63	63.7168	18701.5	1.94914	15.9798	8.74658	0.59441	8.79138	0.06889	0.886384	0.100824	429.465	3.68268	473.68	33.2911	693.974	186.759	429.465	3.68268	61.8849
CH-4D1-57	439.211	38748.1	2.02859	17.9549	1.91137	0.529123	3.60948	0.068903	3.06186	0.848284	429.543	12.7234	431.227	12.6827	440.213	42.5519	429.543	12.7234	97.5763
CH-4D1-65	223.722	8288.09	1.87247	17.397	4.30521	0.54638	4.5112	0.0689394	1.34762	0.298727	429.763	5.60273	442.623	16.1859	510.065	94.6814	429.763	5.60273	84.2566
CH-4D1-34	132.183	17891.4	2.18982	19.1427	6.134	0.498702	6.2284	0.0692379	1.08031	0.173449	431.563	4.50958	410.824	21.0472	295.901	140.092	431.563	4.50958	145.847
CH-4D1-17	265.621	56181.4	2.08458	18.5287	2.44723	0.517404	2.65247	0.0695301	1.02309	0.38571	433.324	4.28756	423.416	9.18378	369.793	55.1249	433.324	4.28756	117.18
CH-4D1-88	454.859	31753.1	2.26392	18.2305	1.17123	0.529077	1.40503	0.0699547	0.776105	0.552375	435.883	3.27107	431.197	4.93639	406.216	26.2153	435.883	3.27107	107.303
CH-4D1-75	224.322	31298.4	1.14373	18.3914	2.80078	0.529324	2.97019	0.0706048	0.98876	0.332894	439.799	4.20353	431.361	10.4388	386.521	62.902	439.799	4.20353	113.784
CH-4D1-8	44.5465	7585.38	1.47971	17.9798	22.2199	0.558196	22.317	0.07279	2.0792	0.0931669	452.942	9.09437	450.352	81.3501	437.123	500.176	452.942	9.09437	103.619
CH-4D1-77	282.585	56058.1	4.66441	18.4428	1.98277	0.556839	2.89749	0.0744825	2.11283	0.729195	463.105	9.44144	449.467	10.5233	380.251	44.5694	463.105	9.44144	121.789
CH-4D1-67	239.157	28947	1.46982	17.0714	3.68505	0.61666	5.63918	0.0763506	4.26858	0.75695	474.303	19.5192	487.751	21.8444	551.413	80.4839	474.303	19.5192	86.0159
CH-4D1-79	212.671	18366.8	1.50189	17.0936	5.35809	0.627602	5.47791	0.0778065	1.13949	0.208015	483.017	5.30278	494.601	21.4509	548.617	117.102	483.017	5.30278	88.0426
CH-4D1-66	213.727	33813.7	2.8263	17.8718	3.98293	0.601764	4.29221	0.0779999	1.5998	0.372722	484.173	7.46209	478.352	16.3748	450.521	88.5118	484.173	7.46209	107.47
CH-4D1-31	457.455	10809.7	1.82624	17.0641	2.61753	0.637211	3.2279	0.0788617	1.88887	0.58517	489.325	8.90063	500.578	12.7571	552.377	57.1335	489.325	8.90063	88.5854
CH-4D1-25	124.618	28390.3	1.44195	17.9824	4.93022	0.610459	5.01189	0.0796166	0.901069	0.179786	493.834	4.28361	483.85	19.2926	436.806	109.827	493.834	4.28361	113.056
CH-4D1-74	128.978	28974.4	2.28009	17.0094	6.58187	0.647916	6.72029	0.0799293	1.35693	0.201916	495.701	6.47422	507.196	26.8351	559.363	143.622	495.701	6.47422	88.6187
CH-4D1-86	194.956	27895.2	1.86208	17.7405	6.90479	0.621581	7.03279	0.0799765	1.33565	0.189918	495.982	6.37617	490.838	27.3793	466.922	153.082	495.982	6.37617	106.224
CH-4D1-37	463.166	40816	2.01346	17.5174	2.05777	0.6313	3.31573	0.0802056	2.59993	0.784119	497.35	12.4445	496.905	13.0297	494.835	45.3688	497.35	12.4445	100.508
CH-4D1-14	148.651	15331.9	1.20058	16.5749	4.82078	0.667821	6.17211	0.0802803	3.85422	0.624457	497.795	18.4641	519.386	25.0993	615.492	104.137	497.795	18.4641	80.8776
CH-4D1-43	214.688	40566.1	1.39658	17.713	5.18934	0.626305	5.27658	0.0804595	0.955575	0.181097	498.865	4.58724	493.791	20.636	470.31	114.947	498.865	4.58724	106.072
CH-4D1-49	234.886	11253.8	1.28547	16.8646	3.01466	0.658398	3.43611	0.0805312	1.64884	0.479858	499.293	7.92182	513.634	13.8524	577.983	65.5251	499.293	7.92182	86.3853
CH-4D1-61	247.574	40267.6	2.00138	17.9033	2.65132	0.620755	2.88791	0.0806032	1.14479	0.396409	499.722	5.50468	490.32	11.2314	446.611	58.9457	499.722	5.50468	111.892
CH-4D1-3	157.483	30802.7	1.46837	17.6426	5.16819	0.630005	6.00162	0.0806133	3.0511	0.508379	499.782	14.6727	496.099	23.5576	479.116	114.307	499.782	14.6727	104.313
CH-4D1-28	191.045	38697	2.09001	17.5471	3.52139	0.640154	4.25615	0.0814682	2.39052	0.561662	504.88	11.6087	502.401	16.8689	491.105	77.7058	504.88	11.6087	102.805
CH-4D1-92	176.226	39231.1	1.32601	17.416	3.98773	0.646166	4.01275	0.081619	0.447436	0.111504	505.779	2.17654	506.117	15.9948	507.665	87.7442	505.779	2.17654	99.6286
CH-4D1-40	230.183	25426.6	1.2812	17.2579	4.72501	0.663958	4.77259	0.0831051	0.672273	0.140861	514.63	3.32523	517.032	19.339	527.682	103.631	514.63	3.32523	97.5266
CH-4D1-76	454.034	103626	2.53557	17.5914	1.83796	0.653471	2.30056	0.0833731	1.38365	0.601439	516.225	6.86423	510.612	9.2322	485.55	40.5982	516.225	6.86423	106.318
CH-4D1-62	510.649	107432	1.4987	17.4392	1.75738	0.659927	2.20435	0.0834682	1.3307	0.603669	516.791	6.60849	514.569	8.89873	504.714	38.6742	516.791	6.60849	102.393
CH-4D1-77	248.558	45736.4	1.68267	17.0557	4.2284	0.675694	4.47965	0.0835831	1.47915	0.330194	517.474	7.35508	524.169	18.3433	553.444	92.3064	517.474	7.35508	93.5008
CH-4D1-36	779.037	108953	1.84851	17.4597	0.977918	0.663171	1.53226	0.0839773	1.17962	0.769855	519.819	5.89117	516.552	6.20378	502.122	21.5274	519.819	5.89117	103.524
CH-4D1-80	1100.25	109077	2.25031	17.4567	0.529061	0.663614	1.78226	0.0840187	1.70193	0.954925	520.065	8.50351	516.822	7.21891	502.495	11.6576	520.065	8.50351	103.497
CH-4D1-2	224.943	29020.7	1.18063	16.7959	4.57843	0.691959	4.82724	0.084291	1.52976	0.316903	521.685	7.66617	533.977	20.0482	586.855	99.3936	521.685	7.66617	88.895
CH-4D1-96	525.608	7111.01	1.02504	14.6836	19.0358	0.792798	19.0959	0.0844295	1.51374	0.0792701	522.508	7.59734	592.758	85.9483	871.71	397.726	522.508	7.59734	59.9406
CH-4D1-71	760.336	137516	3.6895	17.4924	0.841758	0.665621	1.0317	0.0844451	0.596536	0.578205	522.601	2.99449	518.047	4.18637	497.99	18.5434	522.601	2.99449	104.942
CH-4D1-15	172.384	28377.1	3.55302	16.9373	2.24668	0.70029	4.69642	0.0860243	4.12417	0.878152	531.982	21.059	538.964	19.6429	568.638	48.9057	531.982	21.059	93.5536
CH-4D1-39	312.752	29709.2	1.07987	17.0737	1.12521	0.695054	1.38561	0.0860685	0.808602	0.58357	532.244	4.13086	535.832	5.76915	551.159	24.5594	532.244	4.13086	96.5681
CH-4D1-97	396.359	61527.5	1.91854	17.4988	2.05699	0.68288	2.51694	0.0866664	1.45044	0.576272	535.792	7.45715	528.513	10.3707	497.202	45.324	535.792	7.45715	107.761
CH-4D1-87	322.32	44225	2.53159	17.3683	1.61171	0.690986	2.06125	0.0870412	1.28496	0.62339	538.015	6.63267	533.393	8.55264	513.659	35.4324	538.015	6.63267	104.741
CH-4D1-4	904.305	188803	1.19864	17.486	1.03635	0.689343	1.96414	0.0874226	1.66848	0.84947	540.276	8.64698	532.406	8.13822	498.798	22.8159	540.276	8.64698	108.316
CH-4D1-26	184.749	16741.3	1.05895	16.8267	3.75776	0.716745	4.60931	0.0874708	2.66928	0.579105	540.562	13.8407	548.744	19.5424	582.858	81.6304	540.562	13.8407	92.7433
CH-4D1-23	238.161	44636	1.41066	17.3429	2.06677	0.700277	3.8897	0.0880829	3.29519	0.847157	544.189	17.1961	538.957	16.268	516.859	45.3863	544.189	17.1961	105.288
CH-4D1-16	944.608	71106.6	22.5916	17.1106	1.56343	0.710702	2.70235	0.0881968	2.20417	0.81565	544.864	11.5162	545.163	11.3999	546.394	34.1551	544.864	11.5162	99.72
CH-4D1-70	386.146	115608	2.45371	17.4575	1.71432	0.70683	1.92689	0.0894942	0.87978	0.456581	552.545	4.65867	542.862	8.10252	502.43	37.7487	552.545	4.65867	109.974
CH-4D1-42	202.646	25247.7	1.44338	16.2897	6.10084	0.768873	6.14581	0.0908375	0.742104	0.12075	560.488	3.98371	579.116	27.1313	652.881	131.041	560.488	3.98371	85.8485
CH-4D1-1	862.032	65802.8	2.79769	16.9149	1.15964	0.761398	2.6612	0.0934073	2.39525	0.900063	575.657	13.1907	574.816	11.681	571.473	25.2286	575.657	13.1907	100.732
CH-4D1-95	722.05	40132.1	2.78898	8.33394	11.0733	2.0639	12.6466	0.124749	6.10891	0.483049	757.842	43.6789	1136.91	86.7103	1956.07	198.353	1956.07	198.353	38.743
CH-4D1-7	97.93	29490	1.63174	15.415	3.53663	1.12822	4.49812	0.126135	2.77944	0.617912	765.776	20.0688	766.903	24.217	770.167	74.4801	765.776	20.0688	99.4299
CH-4D1-94	206.047	58405.4	0.728112	15.1707	1.36347	1.18466	1.40091	0.130346	0.321739	0.229664	789.84	2.39171	793.48	7.71363	803.7	28.5726	789.84	2.39171	98.2755
CH-4D1-90	222.66	6363.15	2.01929	14.429	4.42739	1.24901	7.71145	0.130707	6.31385	0.818763	791.899	47.0511	822.957	43.5117	907.811	91.2218	791.899	47.0511	87.2316
CH-4D1-59	348.216	73072.3	1.47412	15.3439	1.32422	1.17478	1.53646	0.130735	0.779204	0.507143	792.056	5.80764	788.88	8.42757	779.893	27.8366	792.056	5.80764	101.559
CH-4D1-38	194.411	52094.2	1.59345	15.3023	1.83415	1.20883	2.96122	0.134159	2.32481	0.785084	811.549	17.7277	804.654	16.4567	785.599	38.5217	811.549	17.7277	103.303
CH-4D1-85	116.42	28637.2	1.26389	14.7886	4.42282	1.26051	4.96995	0.135198	2.26695	0.456131	817.451	17.4044	828.135	28.147	856.901	91.8787	817.451	17.4044	95.3963
CH-4D1-56	56.7787	26217.8	0.864036	14.9142	4.55028	1.25699	5.77808	0.135967	3.56106	0.616305	821.814	27.4768	826.555	32.6863	839.309	94.8011	821.814	27.4768	97.9156
CH-4D1-47	351.782	32224.9	2.6359	15.1494	0.691607	1.28151	1.30409	0.140804	1.10559	0.847786	849.209	8.79664	837.527	7.4378	806.652	14.4954	849.209	8.79664	105.276
CH-4D1-78	190.996	61954.1	2.75539	15.0333	1.15173	1.33028	1.87109	0.145043	1.47462	0.788108	873.117	12.0414	859.003	10.8462	822.766	24.0452	873.117	12.0414	106.12
CH-4D1-99	182.154	73435.4	1.63059	14.7726	2.00322	1.3652	2.43481	0.146269	1.384	0.568419	880.013	11.3846	874.106	14.271	859.151	41.565	880.013	11.3846	102.428
CH-4D1-58	80.2109	30814.1	3.04965	14.358	3.94729	1.44376	4.22332	0.150345	1.50179	0.355595	902.897	12.6529	907.284	25.3403	917.997	81.2114	917.997	81.2114	98.3552
CH-4D1-73	74.0646	25715.3	1.33272	14.8477	4.49509	1.40394	4.68795	0.151184	1.33081	0.283879	907.595	11.2666	890.6	27.8065	848.616	93.5103	907.595	11.2666	106.95
CH-4D1-72	81.6212	25699	1.81814	14.962	5.7009	1.39495	5.72088	0.151372	0.477675	0.0834967	908.651	4.04838	886.796	33.8466	832.646	118.907	908.651	4.04838	109.128
CH-4D1-21	416.189	19318.1	19.8061	13.5308	2.24532	1.55878	2.36885	0.15297	0.75498	0.318711	917.591	6.45717	953.985	14.6538	1038.88	45.355	1038.88	45.355	88.3254
CH-4D1-100	50.1956	19635.9	2.50858	14.373	3.9748	1.47471	4.04659	0.153729	0.758829	0.187523	921.831	6.51799	920.064	24.4898	915.848	81.8058	915.848	81.8058	100.653
CH-4D1-60	155.658	31139.5	1.4982	14.0056	1.4612	1.62651	6.39647	0.165218	6.22733	0.973558	985.712	56.9224	980.512	40.2416	968.867	29.8184	968.867	29.8184	101.739
CH-4D1-55	643.313	21033.3	2.45751	13.9531	2.36241	1.63587	3.00748	0.165545	1.86117	0.618846	987.52	17.0409	984.121	18.9543	976.557	48.1464	976.557	48.1464	101.123
CH-4D1-13	676.176	3436.49	6.41582	9.50829	6.93486	2.75041	7.92375	0.18967	3.83321	0.483762	1119.59	39.3966	1342.2	59.0702	1717.3	127.63	1717.3	127.63	65.1948
CH-4D1-29	366.435	42943.6	0.882033	11.5919	0.847066	2.59777	2.00569	0.2184	1.81804	0.906442	1273.42	21.0081	1300.01	14.7059	1344.16	16.3605	1344.16	16.3605	94.7368
CH-4D1-51	95.0824	78077.9	0.973881	12.7118	1.81721	2.37951	2.51762	0.219379	1.74246	0.692107	1278.59	20.2088	1236.46	18.0011	1163.75	35.9973	1163.75	35.9973	109.869
CH-4D1-50	306.862	188159	0.37786	10.5677	1.00089	3.29433	3.46382	0.252491	3.31606	0.957342	1451.31	43.0942	1479.71	26.9872	1520.66	18.8717	1520.66	18.8717	95.4398
CH-4D1-82	642.401	138825	0.544626	9.38471	0.373676	4.3631	2.92052	0.296971	2.89652	0.991781	1676.27	42.7548	1705.38	24.1297	1741.31	6.84689	1741.31	6.84689	96.2652
CH-4D1-53	41.4168	17699.9	1.33655	8.16083	1.51498	5.8946	2.50787	0.348889	1.99856	0.796915	1929.29	33.3235	1960.44	21.7744	1993.47	26.9351	1993.47	26.9351	96.7806
CH-4D1-81	345.42	101494	2.53789	4.7124	4.24748	12.6256	5.66612	0.431513	3.75018	0.66186	2312.53	72.8765	2652.13	53.3595	2922.46	68.7681	2922.46	68.7681	79.1297
Ch-4D2-51	250.337	1956.57	1.98185	9.63614	35.4244	0.514785	203.799	0.0359773	200.697	0.984777	227.85	450.029	421.662	866.039	1692.71	675.755	1692.71	675.755	13.4607
Ch-4D2-20	156.763	10234.5	2.48816	15.0661	18.6002	0.546925	19.2513	0.0597621	4.96419	0.257863	374.179	18.0462	442.98	69.2182	818.222	391.794	374.179	18.0462	45.7307
Ch-4D2-98	135.91	80809.3	1.83075	17.7435	5.08641	0.464953	6.08991	0.059834	3.34895	0.549918	374.616	12.1882	387.697	19.6282	466.512	112.711	374.616	12.1882	80.3016
Ch-4D2-92	74.8692	29939.7	2.65401	20.0571	19.1311	0.414195	19.3784	0.0602519	3.08596	0.159247	377.157	11.305	351.891	57.6913	188.342	448.762	377.157	11.305	200.252
Ch-4D2-82	454.663	150784	2.78811	18.062	2.11166	0.465604	2.52243	0.0609931	1.37968	0.546967	381.662	5.11289	388.148	8.13688	426.969	47.1121	381.662	5.11289	89.3887
Ch-4D2-79	128.454	51854.6	1.29803	19.0014	6.05562	0.445449	7.09457	0.0613877	3.69628	0.521001	384.06	13.7813	374.088	22.2035	312.78	137.902	384.06	13.7813	122.789
Ch-4D2-44	236.242	81471.2	2.08312	17.5626	3.05841	0.483119	3.29289	0.0615379	1.22035	0.370602	384.972	4.56048	400.211	10.8919	489.169	67.5089	384.972	4.56048	78.6991
Ch-4D2-72	127.089	81842.6	2.16104	18.6585	4.93017	0.457624	6.2841	0.0619274	3.89658	0.62007	387.337	14.6484	382.604	20.0351	354.06	111.438	387.337	14.6484	109.398
Ch-4D2-91	35.6226	14817.1	1.94208	19.272	15.0297	0.444191	15.6091	0.0620864	4.21361	0.269945	388.301	15.8785	373.203	48.7852	280.529	345.675	388.301	15.8785	138.418
Ch-4D2-81	321.39	152317	3.7871	18.1843	4.10204	0.471296	5.16071	0.062157	3.13148	0.606793	388.73	11.8133	392.084	16.787	411.892	91.7363	388.73	11.8133	94.3768
Ch-4D2-61	258.629	109475	0.943862	18.052	5.96608	0.474818	6.10498	0.0621657	1.29486	0.212099	388.783	4.88541	394.511	19.9599	428.198	133.102	388.783	4.88541	90.7951
Ch-4D2-16	236.832	86997.4	1.29744	17.6493	2.85933	0.485718	4.74359	0.0621742	3.78496	0.79791	388.835	14.2822	401.989	15.7478	478.284	63.212	388.835	14.2822	81.2979
Ch-4D2-63	72.2587	31981.4	1.05735	19.626	11.0213	0.439042	11.0791	0.0624937	1.13071	0.102057	390.773	4.28724	369.577	34.3348	238.694	254.794	390.773	4.28724	163.713
Ch-4D2-2	242.845	70304.6	1.96147	17.6087	3.34131	0.49	3.71344	0.062578	1.62028	0.436328	391.285	6.15132	404.91	12.4005	483.414	73.8093	391.285	6.15132	80.9419
Ch-4D2-90	131.522	23434.9	1.42613	16.9073	11.3576	0.512728	11.5646	0.0628726	2.17831	0.188361	393.071	8.30652	420.282	39.8207	572.478	247.759	393.071	8.30652	68.6614
Ch-4D2-1	44.2967	19603.5	2.25236	19.4768	24.7508	0.44679	24.8096	0.0631132	1.70771	0.0688323	394.531	6.5354	375.029	77.9472	256.239	576.715	394.531	6.5354	153.97
Ch-4D2-93	179.34	99150.9	1.8606	17.7152	3.34181	0.491442	3.744	0.0631419	1.68816	0.450897	394.705	6.46335	405.893	12.5272	470.038	73.9904	394.705	6.46335	83.9729
Ch-4D2-14	246.611	29465.6	1.81239	16.8507	5.37962	0.517357	5.77693	0.0632278	2.10538	0.364446	395.226	8.07105	423.384	20.0026	579.758	116.956	395.226	8.07105	68.1708
Ch-4D2-80	93.6627	37786	2.67808	18.8863	13.0194	0.46187	13.0778	0.0632652	1.23468	0.0944103	395.452	4.73582	385.558	41.9781	326.612	296.62	395.452	4.73582	121.077
Ch-4D2-55	208.347	45334.4	2.3817	17.369	5.54841	0.502294	5.60504	0.0632747	0.79474	0.14179	395.51	3.04879	413.254	19.031	513.605	122.002	395.51	3.04879	77.0067
Ch-4D2-41	150.042	75002	1.71519	17.1313	6.52613	0.509544	7.14331	0.0633097	2.90457	0.406614	395.722	11.1484	418.143	24.4878	543.759	142.795	395.722	11.1484	72.7753
Ch-4D2-84	131.002	49911.8	1.83868	18.3313	6.90239	0.476238	7.21595	0.0633163	2.10404	0.291581	395.762	8.07653	395.489	23.6412	393.869	154.975	395.762	8.07653	100.481
Ch-4D2-68	66.6333	26901.4	1.54229	17.8362	11.3111	0.489912	11.4085	0.063375	1.48743	0.130379	396.118	5.71461	404.851	38.1084	454.96	251.756	396.118	5.71461	87.0666
Ch-4D2-27	55.8463	8297.26	2.02539	13.6445	13.1233	0.641304	13.507	0.0634629	3.1965	0.236656	396.651	12.2968	503.113	53.6373	1021.95	266.721	396.651	12.2968	38.813
Ch-4D2-66	72.7739	31793	2.79589	18.598	9.58674	0.47304	9.65408	0.0638062	1.13826	0.117905	398.732	4.40109	393.286	31.4893	361.371	216.696	398.732	4.40109	110.339
Ch-4D2-73	110.417	56815.5	1.71266	18.943	10.6426	0.464938	10.8912	0.0638766	2.3137	0.212438	399.158	8.95523	387.686	35.1118	319.804	242.462	399.158	8.95523	124.813
Ch-4D2-3	253.165	140981	2.35741	18.2096	1.98152	0.484197	2.76629	0.0639473	1.93026	0.697781	399.587	7.47889	400.948	9.16367	408.781	44.3338	399.587	7.47889	97.7507
Ch-4D2-76	264.812	40705.5	2.31915	17.8169	3.12789	0.495387	3.934	0.0640141	2.38593	0.60649	399.991	9.25345	408.575	13.2336	457.396	69.4227	399.991	9.25345	87.4496
Ch-4D2-12	491.341	39975.2	2.4724	17.8542	3.16408	0.494515	4.36473	0.064035	3.00657	0.688833	400.118	11.6641	407.983	14.6655	452.717	70.2627	400.118	11.6641	88.3815
Ch-4D2-15	110.923	40047.4	1.021	19.3373	8.99276	0.456598	9.21495	0.0640367	2.01136	0.218272	400.128	7.80335	381.889	29.3385	272.742	206.459	400.128	7.80335	146.706
Ch-4D2-69	102.564	44016.7	1.61414	18.5005	6.34928	0.47828	6.50365	0.0641746	1.40857	0.216581	400.964	5.47579	396.892	21.3686	373.223	143.06	400.964	5.47579	107.433
Ch-4D2-50	118.878	53846.2	2.15965	18.7024	10.1314	0.473643	10.4784	0.0642463	2.67422	0.255213	401.398	10.4069	393.702	34.2097	348.771	229.58	401.398	10.4069	115.089
Ch-4D2-83	277.474	106042	2.29937	17.8929	2.52732	0.49542	2.8901	0.0642914	1.4019	0.485069	401.671	5.45917	408.598	9.72224	447.907	56.1696	401.671	5.45917	89.6772
Ch-4D2-75	52.1458	25173.1	1.08609	19.3958	16.3177	0.457222	16.3778	0.064318	1.40217	0.0856137	401.832	5.46234	382.324	52.224	265.864	376.623	401.832	5.46234	151.142
Ch-4D2-58	205.639	104225	1.39009	18.4212	3.51942	0.482907	3.93195	0.0645178	1.75326	0.445901	403.042	6.85001	400.065	13.002	382.882	79.1359	403.042	6.85001	105.266
Ch-4D2-85	613.862	28331.2	2.55816	17.1996	3.63757	0.517231	3.80824	0.064521	1.1273	0.296017	403.062	4.4046	423.3	13.1829	535.075	79.6331	403.062	4.4046	75.3281
Ch-4D2-60	178.319	88033.8	2.57843	18.8995	7.05509	0.471667	7.3606	0.0646524	2.09861	0.285114	403.857	8.21537	392.34	23.958	325.016	160.37	403.857	8.21537	124.258
Ch-4D2-88	127.176	46268.4	1.32027	18.866	5.48314	0.473314	6.10061	0.0647632	2.67443	0.438387	404.528	10.4863	393.475	19.9027	329.007	124.479	404.528	10.4863	122.954
Ch-4D2-24	592.332	41185.9	2.52293	17.7389	1.78682	0.50416	2.50097	0.0648626	1.74989	0.699686	405.13	6.87117	414.515	8.51182	467.12	39.5928	405.13	6.87117	86.7293
Ch-4D2-74	112.616	49678.1	1.02971	19.5602	10.7353	0.457278	10.8125	0.0648712	1.29014	0.119319	405.182	5.06653	382.363	34.4636	246.433	247.826	405.182	5.06653	164.419
Ch-4D2-65	346.714	136255	1.28178	18.2028	2.62604	0.49178	2.98059	0.0649245	1.4099	0.473029	405.505	5.54113	406.123	9.97728	409.617	58.7434	405.505	5.54113	98.9961
Ch-4D2-9	550.841	115987	2.41639	18.2015	1.12335	0.492055	1.82702	0.0649561	1.44086	0.788639	405.696	5.66536	406.31	6.11796	409.779	25.1279	405.696	5.66536	99.0036
Ch-4D2-6	102.078	42726.2	1.45133	19.4276	7.18137	0.461112	7.24523	0.0649719	0.959789	0.132472	405.791	3.77469	385.031	23.221	262.083	165.067	405.791	3.77469	154.833
Ch-4D2-96	391.094	12839.7	1.94794	16.3682	3.4634	0.548121	3.64914	0.0650692	1.1494	0.314977	406.381	4.52674	443.765	13.1195	642.569	74.4551	406.381	4.52674	63.2431
Ch-4D2-71	113.529	47974.8	1.82709	17.7793	8.46008	0.5052	8.75222	0.0651442	2.24241	0.25621	406.835	8.84099	415.217	29.8361	462.044	187.798	406.835	8.84099	88.0511
Ch-4D2-37	132.052	61418.4	1.34019	18.4401	5.83853	0.488483	5.88032	0.06533	0.699786	0.119005	407.959	2.76638	403.876	19.597	380.572	131.363	407.959	2.76638	107.196
Ch-4D2-23	306.621	51193	1.38859	17.6268	3.92514	0.512804	4.09399	0.0655577	1.16363	0.284229	409.337	4.61508	420.333	14.092	481.101	86.7666	409.337	4.61508	85.0832
Ch-4D2-17	373.404	158667	2.15695	18.0426	2.34756	0.501149	3.32312	0.065579	2.35205	0.707782	409.466	9.33133	412.48	11.2652	429.358	52.3574	409.466	9.33133	95.3669
Ch-4D2-36	148.804	13491.6	1.4376	16.5968	9.32033	0.544919	9.32655	0.0655927	0.340539	0.0365128	409.548	1.35129	441.662	33.4144	612.634	201.783	409.548	1.35129	66.8504
Ch-4D2-62	527.244	84867.6	2.51933	18.1977	1.6363	0.497722	1.9426	0.0656903	1.047	0.538968	410.139	4.16039	410.159	6.55502	410.253	36.5993	410.139	4.16039	99.9721
Ch-4D2-42	174.131	67823	1.30553	18.4919	2.76248	0.491098	3.34322	0.0658642	1.88305	0.563242	411.19	7.50113	405.658	11.1808	374.261	62.173	411.19	7.50113	109.867
Ch-4D2-11	148.497	79024	1.90383	17.9059	7.12117	0.507399	7.2374	0.0658939	1.29183	0.178493	411.37	5.14819	416.699	24.7411	446.285	158.431	411.37	5.14819	92.1765
Ch-4D2-18	351.562	54276.4	1.75893	17.5409	3.43201	0.518012	7.75089	0.0659006	6.94965	0.896626	411.411	27.6985	423.823	26.8626	491.931	75.7224	411.411	27.6985	83.6318
Ch-4D2-89	143.18	33117.3	1.72892	17.7404	6.09784	0.512662	6.58668	0.0659618	2.49012	0.378054	411.781	9.9332	420.238	22.6703	466.939	135.159	411.781	9.9332	88.1873
Ch-4D2-31	311.154	125830	2.18273	18.2197	3.46126	0.501247	3.56384	0.0662355	0.848884	0.238194	413.436	3.39942	412.546	12.0828	407.55	77.4618	413.436	3.39942	101.444
Ch-4D2-45	260.758	52327.3	2.9114	17.5429	2.43937	0.52104	2.65293	0.0662936	1.04285	0.393092	413.787	4.17959	425.846	9.22781	491.671	53.8077	413.787	4.17959	84.1594
Ch-4D2-52	462.212	128227	2.07166	17.8249	2.36235	0.514114	3.13174	0.0664641	2.056	0.656504	414.817	8.26005	421.212	10.7978	456.371	52.4218	414.817	8.26005	90.8947
Ch-4D2-43	197.144	57161.7	1.62583	18.4949	6.31164	0.495937	6.78802	0.0665237	2.49809	0.368015	415.178	10.0446	408.948	22.8539	373.905	142.171	415.178	10.0446	111.038
Ch-4D2-87	106.191	59708.6	1.51336	18.3173	7.71097	0.501103	8.18879	0.0665712	2.75629	0.336594	415.465	11.0902	412.449	27.7635	395.583	173.134	415.465	11.0902	105.026
Ch-4D2-13	254.16	56911.3	1.52324	17.7301	3.66843	0.518896	4.04481	0.0667252	1.70385	0.421244	416.396	6.87048	424.414	14.0316	468.225	81.2502	416.396	6.87048	88.9307
Ch-4D2-46	70.4923	30033.9	1.15273	18.9119	11.167	0.487035	11.2923	0.0668027	1.6773	0.148534	416.864	6.77077	402.888	37.5707	323.528	254.328	416.864	6.77077	128.85
Ch-4D2-97	132.688	16344.7	1.50726	17.5843	5.75434	0.524953	5.76611	0.066949	0.368304	0.0638738	417.748	1.48979	428.455	20.1574	486.476	127.106	417.748	1.48979	85.8723
Ch-4D2-22	1100.82	79625.8	2.38803	17.3581	5.75907	0.534109	6.20853	0.0672404	2.31927	0.373561	419.509	9.41971	434.533	21.9513	514.942	126.612	419.509	9.41971	81.4671
Ch-4D2-19	847.746	89522	1.65612	17.7317	2.40346	0.525123	2.78809	0.067532	1.41309	0.506832	421.269	5.76258	428.568	9.74778	468	53.2263	421.269	5.76258	90.0149
Ch-4D2-49	270.001	103929	2.33444	18.0961	3.51669	0.515177	3.57661	0.0676145	0.651931	0.182276	421.768	2.66161	421.925	12.3486	422.759	78.4987	421.768	2.66161	99.7655
Ch-4D2-26	143.942	47025.8	3.06954	17.5619	4.67383	0.531233	5.49919	0.0676638	2.89766	0.526925	422.065	11.8383	432.628	19.3743	489.247	103.183	422.065	11.8383	86.2683
Ch-4D2-7	252.109	81848.4	3.67979	18.5394	4.46625	0.509889	4.70145	0.0685599	1.46843	0.312335	427.474	6.07355	418.374	16.1224	368.486	100.692	427.474	6.07355	116.008
Ch-4D2-64	249.757	94002.6	1.40436	17.9519	2.93512	0.529024	3.47417	0.0688788	1.85875	0.535019	429.397	7.72141	431.162	12.2057	440.579	65.3133	429.397	7.72141	97.4621
Ch-4D2-34	109.607	51940.8	1.78368	17.5891	6.48152	0.541565	7.45066	0.0690863	3.67453	0.493182	430.649	15.3074	439.456	26.5835	485.831	143.221	430.649	15.3074	88.6417
Ch-4D2-30	289.684	28580.4	3.73932	17.644	2.55497	0.540705	6.34269	0.069192	5.80532	0.915278	431.286	24.2185	438.889	22.6056	478.948	56.4749	431.286	24.2185	90.0485
Ch-4D2-40	687.964	84487.4	2.32325	17.678	4.33392	0.547956	4.99279	0.0702551	2.47893	0.496502	437.693	10.49	443.657	17.9476	474.704	95.9076	437.693	10.49	92.2033
Ch-4D2-67	213.174	79436.8	1.64401	17.6822	4.94548	0.558233	5.19861	0.0715896	1.60242	0.30824	445.726	6.90107	450.376	18.9126	474.21	109.47	445.726	6.90107	93.9933
Ch-4D2-95	260.119	100986	3.84323	17.1093	2.94635	0.645896	3.65148	0.080148	2.15693	0.5907	497.006	10.3173	505.95	14.5509	546.569	64.3595	497.006	10.3173	90.9321
Ch-4D2-59	55.0499	36408.4	1.96902	18.2377	14.1303	0.619317	14.2951	0.0819184	2.16415	0.151391	507.563	10.5631	489.419	55.5688	405.341	317.735	507.563	10.5631	125.219
Ch-4D2-57	599.106	3554.79	2.04893	12.9773	5.93808	0.881068	6.27926	0.0829262	2.04165	0.325141	513.565	10.0784	641.559	29.8723	1122.66	118.503	513.565	10.0784	45.7452
Ch-4D2-38	335.6	30131.7	2.09164	15.7969	7.59379	0.72661	7.74441	0.0832476	1.51998	0.196268	515.478	7.53011	554.561	33.1039	718.425	161.452	515.478	7.53011	71.7512
Ch-4D2-35	160.924	94669.8	1.70716	17.3249	5.5346	0.664477	5.73436	0.0834931	1.50039	0.26165	516.939	7.45329	517.349	23.2484	519.139	121.582	516.939	7.45329	99.5763
Ch-4D2-25	654.612	223544	1.41697	17.4022	1.11464	0.685835	1.24043	0.0865612	0.544268	0.438775	535.167	2.79512	530.295	5.124	509.383	24.4996	535.167	2.79512	105.062
Ch-4D2-78	184.025	109346	1.9614	17.1916	3.86767	0.72172	7.03913	0.0899876	5.88137	0.835524	555.464	31.3012	551.682	29.9696	536.118	84.6755	555.464	31.3012	103.609
Ch-4D2-32	85.1042	12375.1	0.457409	14.1186	12.2714	0.952522	12.3427	0.097536	1.3247	0.107326	599.953	7.58893	679.415	61.2132	952.461	251.918	599.953	7.58893	62.9897
Ch-4D2-4	117.968	103711	1.61488	15.1871	2.01184	1.11602	3.00308	0.122927	2.22957	0.742428	747.387	15.7338	761.069	16.0837	801.446	42.1558	747.387	15.7338	93.2548
Ch-4D2-48	103.265	78528.8	1.70476	15.7001	4.49571	1.12859	4.56906	0.128511	0.815388	0.178459	779.363	5.98571	767.083	24.6029	731.504	95.2787	779.363	5.98571	106.542
Ch-4D2-56	200.202	150853	4.25178	7.89964	2.51944	2.95624	2.9617	0.169373	1.55696	0.525697	1008.66	14.5374	1396.45	22.475	2051.1	44.5009	2051.1	44.5009	49.1763
Ch-4D2-33	71.1299	170959	3.25301	8.14533	1.45626	6.24598	3.51376	0.368984	3.19778	0.910074	2024.62	55.5632	2010.91	30.7637	1996.85	25.8806	1996.85	25.8806	101.391
Ch-4D2-28	159.85	422271	23.6328	5.54578	3.14281	9.17853	7.81048	0.369177	7.15027	0.915471	2025.52	124.299	2355.97	71.6334	2655.78	52.1226	2655.78	52.1226	76.2686
Ch-4D2-70	339.039	998668	1.56169	5.37999	0.267478	13.1817	0.72099	0.514343	0.669539	0.928638	2675.14	14.6596	2692.75	6.8047	2705.98	4.41453	2705.98	4.41453	98.8604
SJS6-106-R331	110.64	13996.4	1.35228	18.5329	6.44558	0.48585	7.02622	0.0653048	2.79684	0.398057	407.806	11.0524	402.078	23.3322	369.274	145.328	407.806	11.0524	110.435
SJS6-106-R332	254.417	28023.1	1.34908	18.2804	1.98525	0.494844	2.16267	0.0656075	0.857864	0.396669	409.638	3.40481	408.206	7.26942	400.093	44.4678	409.638	3.40481	102.386
SJS6-106-R333	117.397	8836.94	1.49901	18.5167	6.04912	0.496475	6.08748	0.0666745	0.682331	0.112087	416.089	2.74942	409.314	20.5095	371.252	136.345	416.089	2.74942	112.077
SJS6-106-R335	427.92	39591.7	0.742499	17.9571	1.94467	0.52038	2.91906	0.0677729	2.17696	0.745775	422.724	8.90731	425.405	10.1451	439.936	43.2948	422.724	8.90731	96.0877
SJS6-106-R334	235.497	42792.5	1.58612	18.5334	3.57892	0.507256	3.77226	0.0681838	1.19216	0.316034	425.204	4.90555	416.602	12.8912	369.216	80.6341	425.204	4.90555	115.164
SJS6-106-R334	169.166	18914.1	1.34352	17.615	6.76946	0.558157	7.09304	0.071308	2.11791	0.298591	444.031	9.08763	450.326	25.8048	482.62	149.69	444.031	9.08763	92.0043
SJS6114-R331	128.179	47960.4	1.96926	18.2134	8.19018	0.515498	8.37127	0.068095	1.73181	0.206876	424.669	7.11745	422.139	28.9208	408.324	183.532	424.669	7.11745	104.003
SJS6114-R332	134.849	13166.7	1.40718	19.1786	6.54825	0.474918	6.63914	0.0660594	1.09479	0.1649	412.371	4.37323	394.58	21.7099	291.64	149.707	412.371	4.37323	141.397
SJS6114-R333	58.6982	7134.3	1.78717	19.0688	13.5411	0.489355	13.6229	0.0676778	1.49091	0.109441	422.15	6.09222	404.471	45.4796	304.738	309.8	422.15	6.09222	138.529
SJS6114-R334	243.215	21139.6	1.5031	17.8271	2.46829	0.518156	3.07985	0.0669944	1.84201	0.598085	418.023	7.45568	423.919	10.6738	456.105	54.796	418.023	7.45568	91.6504
SJS6114-R335	248.777	57249.6	1.10614	18.2572	6.08468	0.499404	6.28585	0.0661278	1.57751	0.250962	412.785	6.30762	411.299	21.2613	402.948	136.396	412.785	6.30762	102.441
TSA-138-R331	100.932	16160.5	1.06752	18.2286	7.96247	0.506771	8.05519	0.0669985	1.2187	0.151294	418.047	4.93308	416.276	27.5155	406.449	178.456	418.047	4.93308	102.854
TSA-138-R332	202.637	24757.3	0.900073	18.4849	2.21499	0.511498	2.57587	0.0685739	1.31489	0.510464	427.558	5.43953	419.456	8.85117	375.12	49.8421	427.558	5.43953	113.979
TSA-138-R333	198.708	33655.1	0.915992	17.9017	4.27485	0.526131	4.69706	0.0683104	1.94628	0.414362	425.968	8.02257	429.239	16.4436	446.814	95.0419	425.968	8.02257	95.3347
TSA-138-R334	156.426	25213.2	0.859248	18.8175	4.83825	0.502196	5.26798	0.0685383	2.08398	0.395593	427.344	8.61697	413.188	17.884	334.866	109.706	427.344	8.61697	127.616
TSA-138-R335	138.615	15988.9	0.945624	18.9325	6.33465	0.488856	6.61998	0.0671254	1.92261	0.290425	418.814	7.79617	404.13	22.0741	321.063	144.061	418.814	7.79617	130.446
CH-4D1-R331	134.139	30042.1	2.48812	17.5048	3.88403	0.53969	4.41186	0.0685172	2.09256	0.474303	427.216	8.64997	438.22	15.7035	496.443	85.6119	427.216	8.64997	86.0554
CH-4D1-R332	58.2309	9838.87	2.83617	19.5341	19.7877	0.470335	19.8138	0.0666345	1.0166	0.0513074	415.847	4.09402	391.42	64.4424	249.523	459.337	415.847	4.09402	166.657
CH-4D1-R333	125.402	25647.6	1.86074	18.5979	8.20156	0.493123	8.31829	0.0665149	1.38866	0.16694	415.125	5.58296	407.037	27.9019	361.384	185.293	415.125	5.58296	114.871
CH-4D1-R334	151.754	29371.7	1.5495	17.9005	4.46581	0.529681	4.70072	0.0687668	1.46742	0.31217	428.722	6.08652	431.598	16.529	446.957	99.2672	428.722	6.08652	95.9203
CH-4D1-R335	54.8409	12812.3	2.97731	16.9451	14.6729	0.547011	14.7674	0.0672261	1.66824	0.112968	419.422	6.77422	443.037	53.068	567.644	320.966	419.422	6.77422	73.8882
Ch-4D2-R331	163.014	94515.1	2.98168	17.7268	5.06179	0.53452	5.09788	0.0687215	0.605481	0.118771	428.448	2.50984	434.805	18.0325	468.595	112.155	428.448	2.50984	91.4326
Ch-4D2-R332	72.9414	29038.9	1.81988	17.1056	6.71684	0.543975	6.77482	0.0674862	0.884419	0.130545	420.993	3.60437	441.042	24.2409	547.043	146.896	420.993	3.60437	76.9579
Ch-4D2-R333	94.0412	47721	2.98457	18.2344	13.291	0.500632	13.3126	0.0662078	0.756871	0.0568539	413.268	3.02975	412.13	45.1255	405.738	298.646	413.268	3.02975	101.856
Ch-4D2-R334	196.928	56047.5	1.58801	17.4564	6.44003	0.529321	6.44404	0.0670152	0.227185	0.0352551	418.148	0.919817	431.359	22.6507	502.521	141.906	418.148	0.919817	83.2101
Ch-4D2-R335	91.115	57158.3	2.64471	17.659	9.7253	0.528135	9.86754	0.067641	1.66938	0.169179	421.928	6.81802	430.571	34.641	477.07	215.477	421.928	6.81802	88.4415
DATA for Standards:
SJS6-106-R331-R334: Mean = 416.7±8.9 [2.1%] 95% conf.; Wtd by data-pt errs only, 0 of 6 rej.; MSWD = 3.5, probability = 0.004
SJS6-114-R331-R335: Mean = 416.7±5.2 [1.2%] 95% conf.; Wtd by data-pt errs only, 0 of 5 rej.; MSWD = 0.86, probability = 0.49
TSA-138-R331-R335: Mean = 422.9±5.6 [1.3%] 95% conf.; Wtd by data-pt errs only, 0 of 5 rej.; MSWD = 0.60, probability = 0.66
CH-4D1-R331-R335: Mean = 419.4±5.0 [1.2%] 95% conf.; Wtd by data-pt errs only, 0 of 5 rej.; MSWD = 1.13, probability = 0.34
CH-4D2-R331-R335: Mean = 419.1±4.9 [1.2%] 95% conf.; Wtd by data-pt errs only, 0 of 5 rej.; MSWD = 4.8, probability = 0.001
All R33 analyses; Mean = 418.8±2.0 [0.47%] 95% conf.; Wtd by data-pt errs only, 0 of 26 rej.; Wtd by data-pt errs only, 0 of 26 rej.; MSWD = 2.0, probability = 0.002
Analyses with >10% uncertainty (1-sigma) in 206Pb/207Pb age are not included, unless 206Pb/238U age is <600 Ma (in red italics).
Best age is determined from 206Pb/238U age for analyses with 206Pb/238U age < ~1000 Ma and from 206Pb/207Pb age for analyses with 206Pb/238Uage > ~1000 Ma.
	Actual cutoff used is different for each sample, selected to avoid dividing clusters of ages.
Concordance is based on 206Pb/238U age / 206Pb/207Pb age, with 100% = concordant. Value is not reported for 206Pb/238U ages <600 Ma because of large uncertainty in 206Pb/207Pb age.
Analyses with 206Pb/238U age > 500 Ma and with >10% discordance (<90% concordance) are not included (in red italics).
Analyses with 206Pb/238U age > 500 Ma and with >5% reverse discordance (>105% concordance) are not included (in red italics).
All uncertainties are reported at the 1-sigma level, and include only internal (measurement) errors.
External (systematic) errors are as follows:
	SJS6-106:	206Pb/238U = 1.5%, 206Pb/207Pb = 0.9% (at 2-sigma level)
	SJS6-114:	206Pb/238U = 1.2%, 206Pb/207Pb = 0.9% (at 2-sigma level)
	TSA-138:	206Pb/238U = 2.1%, 206Pb/207Pb = 0.9% (at 2-sigma level)
	Ch4d1:	206Pb/238U = 1.6%, 206Pb/207Pb = 0.9% (at 2-sigma level)
	Ch4d2:	206Pb/238U = 2.6%, 206Pb/207Pb = 1.0% (at 2-sigma level)
Crystals of R33 were analyzed from each mount along with unknowns, and analyzed as secondary standards.
	Individual analyses shown above.
	Weighted mean age is calculated for each mount, and for all analyses above.
	Known age (from ID-TIMS is 419.3 ± 0.4 Ma (Black et al. (2004).
U concentration and U/Th are calibrated relative to Sri Lanka zircon and are accurate to ~20%.
Common Pb correction is from 204Pb, with composition interpreted from Stacey and Kramers (1975).
Uncertainties of 1.5 for 206Pb/204Pb, 0.3 for 207Pb/ 204Pb, and 2.0 for 208Pb/ 204Pb are applied to common Pb composition.
U/Pb and 206Pb/207Pb fractionation is calibrated relative to fragments of a large Sri Lanka zircon of 563.5 ± 3.2 Ma (2-sigma, from Gehrels et al., 2008).
U decay constants and composition as follows: 238U = 9.8485 x 10-10, 235U = 1.55125 x 10-10, 238U/235U = 137.88
Analytical methods as described by Gehrels et al. (2008).
Concordia and age-probability plots made with Isoplot (Ludwig, 2008).
Black, L., Kamo, S., Allen, C., Davis, D., Aleinikoff, J., Valley, J., Mundil, R., Campbell, I., Korsch, R., Williams, I., and Foudoulis, C.,
	2004, Improved 206Pb/238U microprobe geochronology by the monitoring of a trace-element-related matrix effect; SHRIMP, ID-TIMS, ELA-ICP-MS,
	and oxygen isotope documentation for a series of zircon standards: Chemical Geology, v. 205, p. 115-140.
Gehrels, G.E., Valencia, V., Ruiz, J., 2008, Enhanced precision, accuracy, efficiency, and spatial resolution of U-Pb ages by laser ablation-multicollector-inductively
	coupled plasma-mass spectrometry: Geochemistry, Geophysics, Geosystems, v. 9, Q03017, doi:10.1029/2007GC001805.
Ludwig, K.R., 2008, Isoplot 3.6: Berkeley Geochronology Center Special Publication No. 4, 77 p.
Stacey, J.S., and Kramers, J.D., 1975, Approximation of terrestrial lead isotope evolution by a two stage model: Earth and Planetary Science Letters, v. 26, p. 207-221.
